# Supplementary material for: Field-based groundwater recharge and leakage estimations in a semi-arid Eastern Mediterranean karst catchment, Wadi Natuf, West Bank
Source: Copernicus journal article supplement (doi:10.5194/hess-2018-329), 2018-06-25
Supplement: Supplementary file [file hess-2018-329-RC3-supplement.pdf]

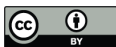

5

**Field-based groundwater recharge  and leakage estimations in a semi-arid Eastern Mediterranean karst catchment, Wadi Natuf, West Bank**

**Clemens Messerschmid<sup>1,2</sup>, Jens Lange<sup>1</sup> and Martin Sauter<sup>2</sup>**

<sup>1</sup> Chair of Hydrology, University of Freiburg, Freiburg, Germany

10

<sup>2</sup> Geoscience Center, Applied Geology, University of Göttingen, Göttingen, Germany

Correspondence to: C. Messerschmid ([clemensmesserschmid@yahoo.de](mailto:clemensmesserschmid@yahoo.de))

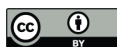

## 15 Abstract

Groundwater recharge processes in semi-arid climates are highly sensitive to spatial and temporal variability (event precipitation). However, in previous research, the spatial distribution of recharge has received relatively little attention. This study differentiates recharge according to the following spatial characteristics: a) soil type and soil condition, b) land forms such as relief, vegetation and land use, and c) lithology and hydrogeological characteristics of the subsurface rock formation. For the first time, this paper analyses and quantifies the specific recharge in the different individual rock formations of the Western Aquifer Basin (WAB). The WAB is a large transboundary karst aquifer that stretches from sub-humid to semi-arid climates from the recharge area in the West Bank Mountains to the Mediterranean Coast. The assessment is based on actual field data, including soil moisture and spring discharge in Wadi Natuf, a 103 km<sup>2</sup> large sub-catchment in the West Bank slopes and mountain region, i.e. the recharge area of the WAB.

A parsimonious soil moisture balance model was set up to calculate daily recharge rates from daily precipitation and evapotranspiration records over an extended period of 7 years (2003/04–2009/10).

Unlike in most comparable studies, the simple but solid parsimonious soil moisture and percolation model and the budget calculations were based on actual quantitative field-observations, in contrast to the generally applied model fitting and inverse calibration. The model's daily deep percolation rate were compared with soil moisture field-data and in addition, **by comparing major event recharge depths with daily spring discharge response.**

This combination of modelling and intensive field measurements, comprising eight different soil moisture measurement stations in six different litho-facies formations allowed identifying and quantifying the recharge characteristics of each formation at high spatial resolution, which is a first in the Western Aquifer.

We found that recharge varies widely at the spatial dimension, ranging between 0 % and almost 60 % of annual rainfall. The spatially variable long-term average recharge coefficients were applied to other outcropping formations by a ranking procedure taking into account each of the three above spatial characteristics (landform, soil and geology).

In addition to the recharge analysis, special emphasis was paid to the examination of the role of perched leaky aquifers positioned between the main regional Upper and Lower Aquifers. The particular geometry of the local aquifers, i.e. hills with well-defined aquifers, **leaky aquitard bases and therefore well-defined catchment areas, allowed the quantification of the flow budget.** By measuring and budgeting spring group discharge of each leaky sub-aquifer, for the first time also leakage coefficients could be calculated empirically.

The methodology of this study is also applicable to comparable catchments and aquifers outside the region. The resulting mean annual recharge coefficients allow the prediction of the spatial distribution of recharge at any given sub-catchment or management cell size, also beyond Wadi Natuf (in a follow-up paper).

**Keywords:** perched karst aquifer discharge, parsimonious soil moisture balance model, recharge coefficients, spatial recharge distribution and ranking, aquifer leakage



## 1 INTRODUCTION

60 The Western Aquifer Basin (WAB), also called Aujah-Tamaseeh or Yarkon-Taninim Basin, is a large (9,000-14,000 km<sup>2</sup>) carbonate multi-layer aquifer system that is of strategic importance for the water supply of Israelis and Palestinians, providing ca. 20 % of the regional water resources. While the underlying regional aquifers are mainly exploited by Israel, Palestinian villages only have shallow wells in the Upper Aquifer (UA) and otherwise depend on karstic springs fed by intermediate local perched aquifers. Detailed knowledge of the temporal and spatial variability of groundwater recharge and leakage from these perched systems is an essential component for sustainable water resources management (SUSMAQ, 2002). Various methods are available to assess recharge and the optimal technique largely depends on system characteristics and data availability (Simmers et al., 1988; Lerner et al., 1990; De Vries et al., 2002; Scanlon et al., 2002, 2006; Lloyd, 1980). Based on Lerner et al. (1990) and Bredekamp et al. (1995), Dörhöfer and Josopait (1997) distinguished two principle avenues or procedures for the assessment of groundwater recharge: Firstly, direct procedures to understand, conceptualize, simulate and quantify as closely and differentiated as possible the different components and processes of inflow (infiltration and percolation), taking into account evapotranspiration, surface runoff, interflow, and soil moisture balance. Secondly, indirect, integral procedures based on the assessment of groundwater discharge (such as spring flow, baseflow, and well abstractions) or the assessment of storage changes within the aquifer (Dörhöfer and Josopait, 1997). Especially for karst regions it is important to distinguish between direct (i.e. percolation through the unsaturated zone) and indirect recharge (i.e. localized infiltration after runoff concentration at the surface). For the perched aquifers in the WAB, indirect recharge via transmission loss processes from ephemeral wadis can be neglected. The wadis are deeply incised and all springs emerge above the talgrund of the Wadis. Hence, all spring water in the leaky aquitards is considered to come from the slopes, hilltops and plains above the spring position (Figure 7, Ch. 4). Therefore, concentrated allogenic inputs such as transmission losses cannot contribute to the recharge of the intermediate perched aquifers within the regional aquitard complex. Thus, precipitation can directly be equated with hydrologically effective rainfall (HEP, Bradbury et al., 2002). Moreover, total surface runoff from Wadi Natuf is found to be negligible in an annual balance with overall 0.11 % runoff coefficients (Messerschmid et al. 2018). Direct recharge to the WAB was usually estimated by empirical relationships that relate cumulated annual groundwater discharge at springs and wells to annual rainfall (Goldschmidt and Jacob, 1958; Guttman et al., 1988; Guttman and Zukerman, 1995; Berger 1999). Here, spatially distributed methods that estimate mean annual recharge from surface characteristics (e.g. Andreo et al., 2008) may provide more spatial detail, but have not yet been applied in the WAB. However, spatial characteristics of different lithologies, land forms and soil conditions are of utmost importance to actual recharge (Dvory, et al., 2016, Hartmann et al., 2012 and Allocca et al., 2014). Such spatially differentiated recharge factors were applied by Andreo et al. (2008) and Radulović et al. (2011). Radulović used a matrix of many different factors, meteorological, lithological, landform and structural factors, set up in a matrix of different weight. And he called for formation specific data to quantify the main ruling factors for recharge. In order to understand these processes conceptually, three sets of determining factors can be identified: a) soil moisture storage that largely depends on the soil type and field capacities at different locations, which in turn are strongly correlated to the thickness of the soil in situ; b) Deep percolation / infiltration from the soil via the unsaturated zone also depends on the receptiveness of the underlying bedrock formation that forms the unsaturated zone of the aquifer (Hughes et al., 2005). Recharge infiltration is determined by the lithology and rock type, the degree of karstification and primary porosity as well as by such factors as degree of fracturing and other structural features. Based on a highly simplified approach for large areas in Spain, Sanz et al. (2011) only accounted for three fundamental factors: Precipitation, temperature and in particular, lithology as “the decisive factor,



largely responsible for determining recharge rates“. They attributed specific **RC**-values in their ranking of relatively broad groups of lithology, such as alluvial, carbonates, pelites and hard rock; c) Changes in **land use and land cover** (LU/LC) often outweigh the impact of climatic change on groundwater recharge. This was demonstrated by Scanlon et al. (2006) in their global literature review. Therefore, recharge processes can be generalised and attributed to three different groups, namely geology, soil and **landform** dominated recharge. Since these three factors strongly depend on the spatial distribution of in-situ conditions such as lithology, soil and landform, the researcher has two options: Either introduce indirect **theoretical** values from the literature and fit the parameters by **repeated** calibration, or invest into detailed field work in order to empirically assess and control the spatial variability of the spatial physical factors determining recharge. **In contrast to former studies**, this analysis will use measured field data and data-based calculations to provide the basis for a spatially distributed recharge assessment.

As for the temporal dimension, and in particular **semi-arid** climates, annual **estimates** for recharge coefficients were found to underestimate recharge. This is why Cheng et al. (2017) postulated to determine recharge on a storm-event basis. This claim was corroborated by a nearby field study that fitted a soil moisture balance model to soil moisture measurements and identified recharge pulses (Ries et al. 2015, 2017). Other field studies quantified event water balances during sprinkling experiments and pointed to the importance of soil saturation for surface runoff and recharge (Lange et al., 2003). Cave drip studies (Frumkin, 1994, Bar-Matthews et al., 1995, Sheffer et al., 2008, 2011) provided point insights into recharge processes, and, combined with hydrological tracers, assessed fractions of old and young recharge waters (Arbel et al., 2010, Lange et al., 2010). However, it is difficult to extrapolate the results from plot scale field experiments or from localised sub-catchments (1km<sup>2</sup>, Steinmann, 2010 and Grodek et al., 2011) to larger areas in the WAB, where different geology and surface characteristics prevail (Steinman, 2010). In a humid-temperate environment, Geyer et al. (2008) managed to assess **the temporal distribution pulse at the groundwater table of the rapid recharge component by analysing the temporal pattern of the karst spring discharge**.

Larger scale recharge studies in the WAB mostly assessed the average actual recharge into the over- and underlying regional aquifers and as such neglected perched upper aquifer layers, simplifying them as regional aquitard (Weinberger et al., 1994). Most studies used numerical models and indirectly assessed average recharge by fitting their Darcian approaches to storage changes in the regional aquifer (e.g. Goldschmidt and Jacob, 1958; Guttman et al., 1988; Guttman and Zukerman, 1995; SUSMAQ, 2005; Dafny et al. 2008, 2010; Hughes et al., 2005, 2008). Sheffer et al. (2010) modelled recharge in the WAB on a daily basis coupling a water balance approach with a groundwater model. Besides pan coefficient and soil thickness, they fitted recharge coefficients for two classes of lithology, namely limestone/dolomite and chalk/marl. Abusaadah (2011) presented a three-dimensional integrated flow model encompassing plains and slopes as separate recharge and flow zones. However, also here, **accuracy** was limited due to missing data and limited temporal resolution of measurements. He thus called for refined meteorological input, as well as for more details on land use, soil, geology and structural characteristics in the WAB, as many others had done before in other areas (Martínez-Santos and Andreu, 2010).

Groundwater recharge studies, assessing recharge through the spring discharge from well-defined small-scale perched aquifers offer main advantages for the quantification of recharge above other types of techniques: They allow direct measurement of the recharged groundwater, they allow recharge assessment in areas with thick unsaturated zones, such as karst and fractured rock aquifers, they have well defined catchments and account for the spatial variation of the above physical factors, and they allow for the analysis of the temporal variation of the storm-event, important in semi-arid recharge studies. The problem with perched aquifer studies is that leakage through the bottom layer of the aquifer cannot be quantified easily.



155 Only very few authors studied perched aquifer systems per se. Peleg & Gvirtzman (2010) and Weiss  
& Gvirtzman (2007) studied recharge ~~in~~ perched local aquifers ~~and aquitards~~ on small-scale  
erosionally isolated groundwater catchments ~~simulating~~ spring discharge from these units by  
numerical models. Their monthly spring flow data did however not reflect the event chara  of  
recharge. Weiss and Gvirtzman (2007) treated “the bottom unsaturated layer as if it is saturated” 

160 Only Peleg and Gvirtzman (2010) accounted for quantified downward leakage into the deeper layers.  
They conducted a groundwater flow modelling of multiple-horizon perched karstic aquifers and  
springs in isolated aquifers, that partly cover strata usually assigned as belonging to the main regional  
aquitard. However, their model did not include soil moisture balances and was not empirically  
confirmed by field data. Instead, it was entirely based on the reconstruction of spring outflow and  
165 recession curves for the evaluation of hydrological characteristics of the different litho-types and  
formations. Leakage and transfer rates were found by manual calibration through “trial and error” for  
each parameter and through numerous repeated model test runs (Peleg and Gvirtzman, 2010: 23).  
This study aims at the estimation of lithology-, soil- and landform-specific recharge for the formations  
in the carbonate aquifers of Wadi Natuf, located in the central WAB and in addition, the assessment of  
170 leakage through the ~~perched aquifer bottom~~. Using high-resolution measurements of precipitation and  
soil moisture, groundwater recharge is forward calculated as deep percolation (DP) by a parsimonious  
soil moisture balance model, and compared with spring group discharge measurements to determine  
downward leakage. We expect that the resulting classification into “recharge units”, i.e. units of  
uniform properties with respect to recharge ~~generation~~ (underlying bedrock lithology, soil  
175 type/thickness and landform) will allow the regionalisation to other parts of the WAB, as well as to  
other leaky carbonate aquifers in comparable settings.

## 2 STUDY AREA

180 Wadi Natuf is a 103 km<sup>2</sup> catchment stretching from the mountain plateau at the crest of the West Bank  
at 816 m asl down to its foothills at 138 m asl (Figure 1). The topography is characterized by  
undulating hills with deeply incised ephemeral rivers. Within the Natuf catchment, all sub-aquifer  
formations of the WAB and some of the overlying cover series crop out (Figure 1) and are therefore   
exposed to direct infiltration. The climate is typically Eastern Mediterranean with rainfall amount 

185 monotonously rising from the semi-arid Western foothills to sub-humid conditions in the Eastern  
Mountains. Wadi Natuf drains westwards to the Mediterranean Sea and has a low overall runoff  
coefficient of approximately 0.11 %, mainly due to considerable transmission losses (Messerschmid et  
al., 2018) into the karstified carbonate materials underlying the wadis. The axis of the West Bank  
mountain anticlinorium runs approximately 3 km east of the main hydrological divide and structurally  
190 divides the thick Cretaceous aquifer complex of the West Bank Group (in Israel: Judea Group) into an  
Eastern Mountain Aquifer Basin (EAB) and a Western Aquifer Basin (WAB) on the slopes and  
foothills of Wadi Natuf. The WAB extends between Mount Carmel in the North to the Sinai in the  
South and from the West Bank Mountains in the East to the Mediterranean Sea in the West (Figure  
1a). 

195 The general formation dip is westwards, but since the inclination of strata is steeper than the surface  
gradient, the series plunge towards the west and are successively overlain by younger series as one  
follows down the slopes (Figure 1). Conventionally, the WAB is subdivided into two main regional  
aquifer units – the ‘Lower Aquifer’ of Lower Albian age and the ‘Upper Aquifer’ of Upper  
Cenomanian to Turonian age and cover around two thirds (64.4 %) of Wadi Natuf. They are entirely  
200 carbonatic and in most parts strongly karstified. According to this conventional view, they are divided  
by some 100 to 150 m thick marly, chalky and carbonatic series of the so-called ‘Middle Aquitard’  
(Bartov et al., 1981; SUSMAQ, 2002; Messerschmid et al., 2003a, 2003b; ESCWA–BGR, 2013).



However, closer scrutiny reveals that this regional ‘Middle Aquitard’ can be further subdivided into an aquitard or even aquiclude section of yellow soft marl (u–Yat) and more carbonatic, and in parts karstified intermediate perched aquifer horizons (l–Yat) that give rise to numerous small local springs (Messerschmid et al., 2003a, 2003b), together covering 13 % of the catchment (Table 1b). They form one focus of the present study. The carbonates – limestones and dolomites – and marls are complemented by smaller portions of chalk, clay and chert in several of the lithostratigraphic units, especially within the Middle Aquitard. Also within the bottom aquitard of Aptian to Lower Albian age, some aquiferous units (Ein Qinya formation) can be found and give rise to local springs along their small outcrop areas near the anticlinal axis (Messerschmid, 2003). The confining Upper Aquitard is almost entirely made up of impermeable Senonian chalk and therefore void of intermediate aquifers or springs. Unlike in the EAB, most of the faults display limited vertical throws and thus do not act as flow barriers in the WAB (Weinberger et al., 1994). Therefore, folding and dipping are the principle structural features that dominate and direct groundwater flow. In the intermediate aquifers of the central study area, deeply incised Wadis erode and often completely isolate small local aquifers in individual hills or hill groups. This is in contrast to the thick regional aquifers that form two all-encompassing storage and groundwater flow systems. While small contact springs (Fetter, 1994) emerge in large numbers from the isolated intermediate perched aquifers, the recharge areas of the regional Upper and Lower Aquifers on the western flanks of the West Bank are almost entirely void of springs.

The soil cover in Wadi Natuf consists of terra rossa, mostly with thicknesses in the decimetre range. Although regional maps indicate small portions of rendzina in the central part (near Ras Karkar, Figure 1), no such types of soils were found during intensive field reconnaissance and measurement campaigns. The soils have high clay contents and form desiccation cracks during the dry season. During the early half of the winter season, these cracks can act as preferential pathways for infiltration, until the soils swell and cracks close during winter and early spring. Soil thickness was found to strongly correlate with lithology and landforms. These landforms (Messerschmid et al., 2018) in turn, are attributed to relief, topography, vegetation and land use and strongly correlate with formational geology (Figure 2). Except for small plains over the aquitard (upper Yatta formation), no soils with thicknesses larger than one metre were found. Tables 1 and A–1 show the typical soil thickness for different formations in Wadi Natuf. Land use and vegetation can also be categorised according to the underlying geology. In the mountains, terraced hills with olive groves dominate, together with grassland and shrubs, beside some barren hills with rock outcrops. The central study area is characterised by formerly used terraces and a relief of stepped hills, a result of both, bedding characteristics and lithology-types. The Yatta contains some small plains with agricultural fields (and thick soils) and some areas of exceptional coniferous forest (Messerschmid, 2014). Finally, the foothills in the East exhibit more rock outcrops and grassland with olive groves in alluvial plains along the banks of the wadis. This correlation of underlying geology with relief, climate, soil thickness, vegetation and land use is a striking feature of Wadi Natuf. It allows categorizing key elements of recharge with lithological and hydro-stratigraphical characteristics and a ranking of aquifer and recharging potential for different formations.

## 245 3 METHODOLOGY

### 3.1 Regionalization

Available geological maps (GSI, 2000, 2008; Rofe and Raffety, 1963) were updated in the field with special emphasis on refining the hydrostratigraphy. To obtain an overview of soil conditions for different formations, a matrix of typical soil depths for the local formations and landforms was



250 established, based on extensive field mapping and sampling (Table 1a, Table A–1). Finally, the  
outcrop, i.e. recharge areas for the different sub-aquifers and isolated intermediate karstified perched  
aquifers were delineated by field characterization, mapping, structural and hydrogeological  
considerations (SUSMAQ, 2001). Thereby it was found that the outcrop areas of most isolated  
perched aquifers were fully underlain by aquitards (Figures 2a and 3a), as already noticed by Weiss  
255 and Gvirtzman (2007) and Peleg and Gvirtzman (2010), e.g. by twin marl bands. This finding allowed  
for an accurate localization of recharge catchments for each of the isolated perched aquifers and for  
the calculation of the total aquifer outflows by the daily measured spring flow data in the respective  
spring groups. Based on the key date measurements, the total average multi-annual spring outflow per  
spring group was determined and then the other years calculated according to the specific area rainfall  
260 of each year and in each sub-catchment.

### 3.2 Hydrometric measurements

During a nine year period (2003/04–2011/12) extensive field measurements were conducted, which  
included records of precipitation (11 tipping buckets and 9 daily rainfall totalizers), weather (2  
265 automatic weather stations; AWS, Type Campbell Scientific with CR10X data logger<sup>1</sup>) in the  
mountains and foothills, soil moisture (8 soil moisture monitoring plots in half-hour steps), dozens of  
manual soil moisture sampling sites and daily volumetric spring flow measurements at five individual  
springs. Field measurement campaigns targeted at the entire number of over 100 springs in Wadi  
Natuf and were carried out at four reference dates during summer and winter conditions, respectively.  
270 These reference date measurements facilitated the regional extrapolation of local daily spring readings  
to total sums of spring flow for the different aquifer units, either in daily steps or as annual discharge.  
In order to increase the representativeness of point-scale measurements, parallel soil moisture  
measurements were carried out at different parallel locations during the field campaign (Table 1a). As  
a result, SM was measured at eight locations covering six different litho-facies of five formations. All  
275 in all, 13 yearly data records of SM-measurements could be obtained, despite data loss, vandalism and  
damaged field devices. We used ML2-Theta probes (Delta-T Devices Ltd., Cambridge, GB) and  
ECH2O (Decagon Devices, Inc., Pullman, USA) sensors and loggers, with two to three sensors per  
plot, installed at depths between 5 and 75cm (Table 1a) and run in half-hour mode. During the period  
2003–05, after heavy rain storms, the sensor readings were compared with gravimetric SM lab  
280 measurements from hand-collected soil samples at most sites.

### 3.3 Water balance calculations (SM model)

A parsimonious, soil moisture storage spread-sheet model in daily time steps, which was already  
successfully applied in the adjacent EAB (Schmidt et al., 2014, Sauter, 1992, Rushton et al., 2006 and  
285 Geyer, 2008), was set up with local field capacity and wetting point conditions observed in the field.  
The daily model time step corresponded to daily spring measurements and allowed for the  
identification of individual recharge events that typically last between one and four consecutive days  
(Messerschmid et al., 2018). The model input consisted of measured rainfall from the nearest tipping  
bucket or from the area rainfall in the respective sub-catchment (Messerschmid et al., 2018) and of  
290 potential evapotranspiration applying the Hargreaves formula (Hargreaves et al. 1985). For this  
purpose, mean, maximum and minimum values of maximum air temperature and incoming solar  
radiation were calculated from the two stations installed in Wadi Natuf<sup>2</sup>. Missing data were filled with  
Jerusalem station data (IMS, 2015).

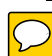

Sensors: Wind – WSS1 (033040), Temp./Rel. humidity – HMP45D (Y3520067), Rain gauge (TB) – ARG100/LX (033505)

<sup>1</sup>For the calculation of potential evapotranspiration ET<sub>p</sub>, the Hargreaves-equation (Hargreaves and Samani, 1985) was selected. It was developed for semi-arid conditions comparable to the Mediterranean climatic characteristics (i.e. mean temperature, mean annual precipitation depth, precipitation distribution during the course of the year):  $ET_p = 0.0023 * Ra * (T_{mean} + 17.8) * (T_{max} - T_{min})^{0.5} * \lambda^{-1}$



At each individual site, measured soil moisture values from different depths were averaged and transformed into a daily value of available water AW [mm], according to the field capacity (FC) [%], wilting point (WP) [%] and local soil depth [mm]. As FC the maximum observed SM plateau value was taken. WP was graphically derived from the observed residual minimum SM prior to the first winter precipitation (Table 1a). Effective field capacity ( $FC_e$ ) [mm] for the model was calculated as the difference between FC and WP and multiplied by soil depth, available water AW (mm) as the difference of measured SM and WP and multiplied by soil depth. It should also be noted that frequently during strong storm events, and particularly in the early half of the season, brief SM peaks (Table 1a) exceeded the plateau values of FC. These overshoots can be interpreted as short periods of over-saturation (e.g. Ries et al. 2015) or as bypass flow through preferential pathways (desiccation cracks) in the aggregate soil texture under dry conditions (Ireson and Butler, 2013, Limbrick, 2002). Those SM peaks are fully accounted for by the spread-sheet model for soil moisture budget calculations shown below. The observed values for SM peaks in Table 1a were corrected to available SM, as in the case of effective FC, by deducting WP from measured soil moisture values. The soil moisture model was tested in the adjacent EAB (Schmidt et al., 2014) and is based on the following two steps: First, when the shallow soils of Wadi Natuf were sufficiently saturated up to field capacity, actual evapotranspiration equalled potential evapotranspiration; when AW fell below daily potential evapotranspiration ETp (mm), actual evapotranspiration Eta (mm) was limited by water availability:

$$\text{Eq. 1} \quad \text{ETa}_{i+1} = \begin{cases} \text{ETp}_{i+1} & \text{if } (\text{AW}_i + \text{P}_{i+1}) \geq \text{ETp}_{i+1} \\ \text{AW}_i + \text{P}_{i+1} & \text{if } (\text{AW}_i + \text{P}_{i+1}) < \text{ETp}_{i+1} \end{cases}$$

where AW is available soil moisture (mm), P daily rainfall (mm), ETa daily actual evapotranspiration (mm) and ETp daily potential evapotranspiration (mm).

Second, all additional rainfall infiltrating from the surface and beyond the daily evapotranspiration losses can either be added to the AW storage, or, when  $FC_e$  limits are exceeded, is considered to percolate into the bedrock and represent recharge:

$$\text{Eq. 2} \quad \text{DP}_{i+1} = \begin{cases} 0 & \text{if } (\text{AW}_i + \text{P}_{i+1} - \text{ETa}_{i+1}) \leq \text{FC}_e \\ \text{AW}_i + \text{P}_{i+1} - \text{ETa}_{i+1} - \text{FC}_e & \text{if } (\text{AW}_i + \text{P}_{i+1} - \text{ETa}_{i+1}) > \text{FC}_e \end{cases}$$

$$\text{Eq. 3} \quad \text{AW}_{i+1} = \text{AW}_i + \text{P}_{i+1} - \text{ETa}_{i+1} - \text{DP}_{i+1}$$

where DP is daily deep percolation, i.e. groundwater recharge (mm).

320

### 3.4 Rating of annual recharge rates for different formations

Daily DP depths (mm/d) were transformed into yearly recharge rates for each soil moisture measurement station and its respective perched aquifer formation and spring group by multiplying annual DP (mm/d) with the delineated recharge area of the aquifer outcrops:

$$\text{Eq. 4} \quad R = \sum \text{DP}_i * \text{AREA} * 0.001$$

where R is the annual recharge [ $\text{m}^3/\text{a}$ ], AREA [ $\text{m}^2$ ] is the delineated recharge area of the permeable formation and the sum  $\sum \text{DP}_i$  of daily percolation rates [mm/d] represents the annual accumulated percolation rate in 365 days [mm/a].

As a result, a set of event-based and formation-specific annual recharge values R [ $\text{m}^3/\text{a}$ ] was obtained for the five formations monitored by SM measurements, three of which perched intermediate aquifers and another two regional aquifer formations (Table 1a).





The modelled formations cover the entire range of recharge potential in the aquifers of Wadi Natuf, from the low permeability aquifers with the least recharge potential to the most highly developed, karstified and highly permeable regional aquifers (Jerusalem and Hebron formations, see Table 1a).  
335 The pure aquicludes, such as the yellow marls of upper Yatta formation, were considered void of recharge. They are unfractured and with Dvory et al. (2016) can be attributed zero effective matrix porosity.

 The remaining five unmonitored formations belong to the Lower Aquifer (l-LBK, u-LBK), the Upper Aquifer (l-Bet, u-Bet) or to a very deep isolated aquifer, separated from the West Bank Group (Ein Qinya). Their recharge potential was grouped according to the three main recharge criteria under three different scenarios<sup>3</sup> – a landform-based scenario as alternative 1 (A.-1), a soil-based (A.-2) and a lithology-based scenario (A.-3) – and ranked accordingly. All three sets of factors are correlated: A.-1 groups the formations according to relief, slope, vegetation and land use, A.-2 according to soil conditions and depth and A.-3 according to litho-facies, karstification, porosity, weathering, joint density and other structural features, mapped in the field (see also Messerschmid et al., 2018).  
340 The highest recharge potential in all scenarios was attributed to the uppermost, Turonian (Jer.) and lowermost, Upper Albian (l-LBK) formations (Table 3), as determined in the soil moisture model and budget calculations. The ranking position of the other formations differed between the alternative scenarios. This means that the overall range in annual recharge coefficients (percentage of recharge relative to total precipitation) between the most and least recharging aquifers does not change between the alternatives but is determined by the model and budget calculations. Our ranking distribution only affected the relative position of a formation within the ranked spectrum. The annual recharge coefficients (RC, in % of annual rainfall) of the soil moisture model and budget calculations were applied to the sub-area rainfall of each formation to obtain annual recharge rates (m<sup>3</sup>/a) under each  
345 scenario.

### 3.5 Water balance calculation of spring groups and leakage determination

The water budget for each of the hydrogeologically discrete, isolated spring groups was calculated, based on the measured and calculated spring group outflows and on the inflows, i.e. the modelled  
360 formation recharge.

The final step of the analysis was the determination of annual leakage for different perched aquifers by water budget calculations:

$$\text{Eq. 5} \quad L = R - Q$$

where Q is the annual total spring group discharge from the respective isolated aquifer formation  
365 [m<sup>3</sup>/a] and L is the downward groundwater leakage into underlying strata [m<sup>3</sup>/a]. The flow rates were also area normalised to mm/a, as shown in the tables. Q was calculated from single springs to the entire aquifer unit for the year 2003/04 using the reference ~~date~~ measurements of all springs as described above. Then this annual budget was applied to other years according to the area rainfall of the different years in each of the sub-catchments. As already mentioned, this study will not focus on  
370 the temporal distribution and inter-annual patterns of recharge, but on its spatial variation. The analysis of long-term records with respect to the temporal variation of recharge and the consequential groundwater flow will be the subject of a follow-up paper. The seven years of rainfall measurements can be considered as representative for the long-term range of climatic conditions and a 7-year average of calculated annual RC is believed to be a valid first approximation because the observed years cover  
375 almost the entire range of long-term variation in precipitation in the WAB from very dry to wet years (HSI, 2016).

<sup>3</sup> It should be noted that this step, and this step alone, involved non-empirical estimation and attribution.



## 4 RESULT

### 4.1 Water balance spread-sheet model of soil moisture storage and percolation

380 As shown in Figure 4, measured and modelled soil moisture **matched rather closely**, especially during  
periods of high soil moisture. AW values usually dropped down to zero within one or two months after  
the last major rainfall event. We did not find a ~~single~~-uniform seasonal rainfall threshold for the  
initiation of deep percolation but rather an accentuated individual pattern of SM increase according to  
the temporal rain distribution and prevailing temperature and evaporation in each year. At locations  
385 with thinner soils,  $FC_e$  was reached by mid-November, in the deeper soils by mid-December. Usually,  
 $FC_e$  conditions prevailed during January and February, on rare occasions until April. The season  
2005/06 experienced the most intensive rain event of the entire measurement period occurring  
between 1<sup>st</sup> and 5<sup>th</sup> April 2006. The results of the model – consistently in each year and each location –  
show distinct and marked daily events of deep percolation (recharge) with usually between 11 and 21  
390 days per year, in very wet winters maxima of up to 31 days per year (WZ-hh) and in very dry winters  
minima of down to only  days per year (KF-E) – see also Figure 5.

**Also a close correlation**  was observed when modelled percolation / recharge were compared with  
monitored spring discharge from the respective perched aquifers (Figure 5). At the beginning of the  
season, weak percolation events did not immediately translate into increased spring discharge, while  
395 strong events generated pronounced discharge responses. This is in line with a dual porosity aquifer  
model, where towards the end of the dry summer season matrix reservoirs are depleted and act as a  
buffer to the very rapidly starting and receding karst and fracture flows. Moreover, the individual  
character of different perched aquifers becomes evident.

### 400 4.2 Annual recharge and leakage

A **systematic correlation**  is observed between maximum annual rainfall and maximum recharge (e.g.  
742 mm/a in 2004/05). Minimum annual precipitation depths and minimum annual recharge depths do  
not necessarily correlate. 2007/08 was the driest year (496 mm rainfall), but not the year with the  
lowest recharge. This clearly shows the importance of the temporal distribution of the storm events  
405 and dry intermediate phases controlling water storage in the soil. This had already been shown for a  
regional WAB recharge model (Sheffer et al., 2010). Therefore, annual precipitation rates cannot serve  
as a basis for calculations of recharge. The calculation of recharge by a soil moisture balance approach  
and daily time steps is a prerequisite to account for the temporal variation of soil moisture and a more  
realistic estimate of recharge rates as stipulated by Cheng et al. (2017).

410 Table 2 shows that the study accounts for the variations in soil properties as well as a wide spectrum  
of climatic conditions i.e. it can be considered as representative. The highest recharge rate relative to  
rainfall depth was found in a catchment underlain by highly karstified Turonian limestone formations  
(Jerusalem formation) at the Shuqbah soil moisture measurement site, with over 57 % of recharge.

Note, the typically thin (32 cm) soil cover over Jerusalem formation that allowed for rapid saturation  
415 of the SM reservoir (only 40 mm  $FC_e$ ). By contrast, the lowest recharge was determined for Kufr  
Fidiah (KF), underlain by Upper Albian soft limestones (lower UBK formation). This formation is  
slightly marly and chalky at its top and characterized by rhythmic alterations of thin marl beds in the  
main body of the formation (SUSMAQ, 2002). Because of these characteristics, it can be considered  
as the top confining layer above the regional Lower Aquifer. Moreover, the highest effective water  
420 storage capacities ( $FC_e$  of 185 and 233 mm, respectively) were observed for this formation.



### 4.3 Ranking of formation-specific recharge coefficients

425 The annual recharge coefficients (RC) listed in Table 2 were used for a further analysis of overall recharge in Wadi Natuf. The modelled and qualitatively verified RC-values (Figures 4 and 5) for the eight stations in six different litho-facies of 5 different formations were employed to rank all formations in regional and perched aquifers with respect to their recharge potential.

For the different soil measurement sites eight different recharge rates were derived with high spatial resolution. Annual recharge coefficients ranged between 57 % for highly karstified rocks with very thin soil covers and 30 % in marly limestone formations (Table 3). As already mentioned, the eight soil moisture measurement sites represent a large variety of six different lithofacies of five different formations, covering the entire range of hydraulic properties between karst aquifers and marly aquitards. **Based on the annual values of the seven year period of the different stations multiannual RC were determined for every formation type (Table 3). The formation-specific RC-values were applied**

430 **to the average annual area rainfall rate of the respective formation outcrop, and annual sums of recharge were obtained for the five modelled formation types. Next, the different formations were ranked according to their recharge potential, based on Messerschmid et al. (2018). The three alternative scenarios of such ranking order were run independently according to litho-, soil- and landform-properties. Each formation was attributed a specific RC according to its rank in the**

440 **respective scenario. This was done in order to minimize bias and reduce the arbitrariness of such qualitative, non-numerical evaluations.**

Multiannual overall recharge in Wadi Natuf amounts to ca. 44 % of annual rainfall (Tables 3 and 4). This lies well within the range of RC-values reported in the literature for the Western Aquifer and in other carbonatic Cretaceous aquifers, known as “Mt. Aquifer”, i.e. the Eastern Aquifer Basin, Mt. Carmel and the Galilee. A detailed table (Appendix A) lists the regional and other reported recharge coefficients, both, for annual and event-based calculations and together with the methods applied therein (Table A4). Weiss and Gvirtzman (2007) reported maximum rainfall for one outstanding year (1988) as 91 % of annual rainfall at the small Ein Al-Harrasheh catchment on the SE edge of Wadi Natuf (Table A-4). Allocca (1995) found in the Apennine that for single events up to 97 % of event precipitation may percolate and arrive as recharge at the groundwater table. Rosenzweig (1972) reported that for pasture and grassland at Mt. Carmel Basin, landform-specific recharge can amount to 60 % of annual precipitation. Our findings of a range between <40 % and >47 % of overall annual recharge coefficients lie well in the middle of reported literature (incidentally, Weiss’ & Gvirtzman’s average RC of 47.2 % for Harrasheh sub-catchment matches exactly with our maximum area RC of 47.3 %). RC-values determined in recent studies in the Eastern Aquifer Basin at 33 % in the upper slopes (Ries et al., 2015) and 25 % in the lower slopes near the Jordan Valley (Schmidt et al., 2014) range at the lower end because of its more arid climatic conditions with less rainfall and higher evaporation rates.

The RC-values for the other scenarios A.-1 and A.-3 are documented in Appendix A (Table A-5). Interestingly, the three ranking scenarios of RC resulted in similar overall sums of annual area recharge (because they differ only in their internal ranking distribution, since we adhered to the empirically tested range of maximum to minimum recharge rates. Overall recharge ranges between 24 and 28 Mm<sup>3</sup>/a, basin specific recharge in the WAB from 21-24 Mm<sup>3</sup>/a and with the soil-based scenario A.-2 in the middle (Table 4). In the landform-based scenario (A.-1) the highest recharge rate is assigned to the cliff-forming u-UBK formation (Figure 3b), followed by the Turonian and Upper Albian formations that typically are covered by terraces or exhibit barren rock and karren fields. The forests and slopes of lower Bethlehem (Figures 2a, b and 3c), Ein Qinya and lower Yatta formations show the lowest recharge rates here. In the second, soil-based scenario (A.-2), recharge coefficients are ranked according to soil thickness (Table 1a), analogously to the SM-DP model. Finally, the third, lithology-based alternative (A.-3) has the highest RC in the maturely karstified massive limestone

470



formations (lower LBK and Jerusalem), whereas formations with chalk and marl components are ranked at the lower end of the recharge coefficient spectrum. For further discussion on the relationship between landforms and lithology, see Messerschmid (2014) and Messerschmid et al. (2018).

475 Wadi Natuf surface catchment covers two groundwater basins, as shown in Table 4. The eastern mountain crest of the surface catchment Natuf forms part of the groundwater catchment of the regional Eastern Aquifer Basin (EAB). In addition, the oldest and lithostratigraphically lowest outcropping formations of the Aptian-Lower Albian *Kobar group* (Tammun, Ein Qinya and Qatannah formations, Figures 1b and 6) are hydraulically separated from the EAB and WAB. Therefore, only the areas west of the Kobar group outcrops form the WAB groundwater catchment (85,5 km<sup>2</sup> or 83 % of Wadi  
480 Natuf), as shown in Table 4.

#### 4.4 Spring group budget

The daily records of Qos, Bibi and Abu Sa'efan springs represent Beitillu spring group. The springs  
485 Salem and 'Akkari stand for Wadi Zarqa spring group (Figure 6). Spring discharge of the five springs with daily interval records was combined with the four key date measurement campaigns in three seasons. These campaigns covered all springs of the respective spring groups.

Over the four key date measurement campaigns the outflows at the five daily read springs were found representative for the entire spring group outflow. This allowed us to sum up daily spring flows in the  
490 five springs to annual budgets of outflows in the entire spring groups. Thus, the annual discharge of the entire spring group was calculated for a reference year (2003/04).

Finally, discharge was determined for the remaining years according to this pattern of annual distribution of rainfall and of flows, observed in the daily springs.

Table 5 shows the annual spring discharge for each spring group. The discharge variation between dry  
495 and wet years was found to be 14 % below average discharge for the driest (2008/09) and 26 % above average for the wettest season (2004/05). The spring group discharge rates obviously directly depend on the recharge area of each group (Table 1b).

The annual spring group discharge was calculated with rainfall data from tipping bucket Wadi Zarqa and with the season 2003/04 as reference season.

500

#### 4.5 Leakage from the perched aquifers

505 While the different lithostratigraphic formations of the Upper and Lower Aquifers act as individual large-scale regional aquifers (UA & LA), the intermediate perched aquifers providing discharge to the above springs can be grouped into distinctive spring horizons emerging at the boundary between aquifer horizons and the underlying aquitard (contact springs, Fetter, 1994). Individual well defined catchment areas can be attributed to the spring groups. Therefore, for every one of these spring groups, the individual recharge rates of the aquifer formations can be calculated based on measured spring discharge. Independently, based on soil moisture budget calculations, total recharge can be  
510 determined. The difference between total recharge and the fracture of recharge leaving the system at the springs can be regarded as leakage from the perched aquifers into the underlying strata (other intermediate aquifers beneath or the regional Lower Aquifer). Table 6 and Figure 7 show leakage coefficients ranging between 64 % and 89 %.

Peleg and Gvirtzman (2010) reported a 25-year average coefficient of downward leakage of 78.1 %<sup>4</sup>  
515 in Batir catchment, SE of Betlehem. Their work was based on numerical modelling “by assuming a

<sup>4</sup> calculated after: Peleg and Gvirtzman (2010: 24), Table 2. Mass Balance



constant daily recharge throughout the year, which sums up to the average yearly recharge” in their simulations and was based not on event discharge but on distributed monthly spring readings.

Assuming that only a fraction of total recharge (R) leaves the perched aquifers as spring discharge (Q), leakage (L) and leakage coefficients can be determined for each of the different perched aquifer

520 formations. These rates of R, Q and L can then be regionalised to the total outcrop area of the leaky perched aquifers in Wadi Natuf. **Figure 7 presents a conceptual model of the three leaky aquifers in Wadi Natuf.**

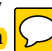

## 525 5 CONCLUSIONS

**The study demonstrated that empirical field-measurement based and spatially differentiated approaches to recharge in the Western Aquifer Basin are available.**

They can be employed to better understand recharge mechanisms with the objective to provide an improved quantitative basis for groundwater resource management. As was already mentioned, the formation-specific recharge rates and the overall results of area recharge in Wadi Natuf match well with the ranges, reported for the Western Aquifer and other carbonatic “Mt. Aquifers”. Soil moisture and spring discharge measurements, together with parsimonious soil moisture storage and percolation modelling at high spatial resolution for different lithostratigraphic units, soil conditions and landforms allow for reliable estimates of typical recharge coefficients. In addition, comprehensive water budget information, including leakage between perched aquifer formations was presented for the first time.

530 Further research will comprise the temporal differentiation of inter-annual recharge variations for each formation and their regionalisation to the entire basin. The replication of this model and measurement campaigns for other soil locations within the wider basin would be a valuable endeavour in the future.

The methodology employed here is believed to be applicable to other types of leaky aquifers in the Mediterranean region, under appropriate climatic and hydrogeological conditions. These conditions form the basic assumptions of our analysis in Wadi Natuf and can be summarised as follows:

- 535 (a) daily individual spring discharge variations can be considered representative for the entire respective spring group and can hence be regionalised to entire aquifer formations (if necessary with the help of representative key date measurements),
- 545 (b) soil moisture measurement plots can be considered as representative for specific aquifer formations, and representative soil thicknesses as well as effective field capacities can be determined,
- (c) the measured time series is long enough (in our case seven years) to cover the prevailing climatic variability (wet & dry years),
- 550 (d) the recharge potential of the different formations, conceptually depends on a few select and interrelated key factors (lithology, landform, soil thickness) and can be ranked according to these criteria,
- (e) the perched aquifers investigated are isolated, and groundwater catchment areas of the corresponding spring groups can be determined with a high degree of accuracy and reliability;
- 555 recharge that does not discharge at the springs can be considered and quantified as leakage.

### *Acknowledgements*

The initial concept and design and the first two measurement seasons of this project were conducted by the Palestinian-British research and development project SUSMAQ, the Sustainable Use of West Bank and Gaza Aquifers, between the Palestinian Water Authority and University of Newcastle upon Tyne, funded by DFID. This work would not have been possible without the selfless efforts and invaluable contributions by many, particularly the daily spring readings by Eng. Majdi Zaydah, Ahmad Bajes and Ahmad Falah. The authors would like to thank Sebastian Schmidt for the spread sheet model and the  $ET_p$  input. Gratitude is also owed to Ivonne Mansbach for many field trips and unwavering support throughout. This article is dedicated to Almut Hoffmann, my beloved partner who tragically was torn out of life in March 2015.



565

**References**

- Abusaada, M. J.: Flow Dynamics and Management Options in Stressed Carbonate Aquifer System, The Western Aquifer Basin, Palestine, PhD Thesis, University of Göttingen, 2011, <https://d-nb.info/1042263574/34>, last access: 19 April 2017.
- Abusaada, M. and Sauter, M.: Recharge Estimation in Karst Aquifers by Applying the Water Level Fluctuation Approach. *International Journal of Earth Science and Geophysics, Int J Earth Sci Geophys* 3:013, 2017.
- Allocca, V., Manna, F., and De Vita, P.: Estimating annual groundwater recharge coefficient for karst aquifers of the southern Apennines (Italy), *Hydrol. Earth Syst. Sci.*, 18, 803–817, doi:10.5194/hess-18-803-2014, 2014.
- Allocca, V., De Vita, P., Manna, F., and Nimmo, J.R.: Groundwater recharge assessment at local and episodic scale in a soil mantled perched karst aquifer in southern Italy, *J. Hydrol.*, 529 (2015) 843–853, doi.org/10.1016/j.jhydrol.2015.08.032, 2017.
- Andreo, B., Vías, J., Durán, J. J., Jiménez, P., López-Geta, J. A., and Carrasco, F.: Methodology for groundwater recharge assessment in carbonate aquifers: application to pilot sites in southern Spain, *Hydrogeol. J.*, 16, 911–925, 2008.
- Arbel, Y., Greenbaum, N., Lange, J., and Inbar, M.: Infiltration processes and flow rates in developed karst vadose zone using tracers in cave drips, *Earth Surf. Process. Landf.*, 35, 1682–1693, doi:10.1002/esp.2010, 2010.
- Bar-Matthews, M., Ayalon, A., Matthews, A., Sass, E., and Halicz, L.: Carbon and oxygen isotope study of the active water-carbonate system in a karstic Mediterranean cave: Implications for paleoclimate research in semiarid regions. *Geochimica et Cosmochimica Acta* Vol. 60 (2), 337-347, doi.org/10.1016/0016-7037(95)00395-9, 1996.
- Bartov, Y., Arkin, Y. A., Lewy, Z. E. and Mimran, Y. A.: Regional stratigraphy of Israel: a guide for geological mapping, (Hebrew), GSI-Report, Geol. Surv. Isr., Tel Aviv, [http://www.gsi.gov.il/\\_uploads/ftp/CurrentResearch/1980/Geology-Regional-Stratigraphy-300dpi-Cleaned.pdf](http://www.gsi.gov.il/_uploads/ftp/CurrentResearch/1980/Geology-Regional-Stratigraphy-300dpi-Cleaned.pdf), last access: 19 April 2018.
- Berger, D.: Hydrological Model for the Yarqon-Taninim Aquifer, (in Hebrew), Mekorot Ltd., Tel Aviv, 50pp., 1999.
- Bredenkamp, D.B., Botha, L.J., van Tonder, G.J. and van Rensburg, H.J.: Manual on quantitative estimation of groundwater recharge and aquifer storativity: based on practical hydro-geological methods, Report (TT 73/95), Water Research Commission, Pretoria, South Africa, 1995.
- Cheng, Y., Zhan, H., Yang, W., Dang, H., and Li, W.: Is annual recharge coefficient a valid concept in arid and semi-arid regions?, *Hydrol. Earth Syst. Sci.*, 21, 5031-5042, doi.org/10.5194/hess-21-5031-2017, 2017.
- Dafny, E., Gvirtzman, H. and Burg, A.: Numerical model for flow and transport at the Yarqon-Taninim Groundwater Basin, GSI-Report, Geol. Surv. Isr., Jerusalem, 40 pp., 2008.
- Dafny, E., Burg, A., and Gvirtzman, H.: Effects of Karst and geological structure on groundwater flow: The case of Yarqon-Taninim Aquifer, Israel, *J. Hydrol.*, 389(3), 260-275. doi: 10.1016/j.jhydrol.2010.05.038, 2010.
- De Vries, J. J. and Simmers, I.: Groundwater recharge: an overview of processes and challenges, *Hydrogeol. J.*, 10, 5–17, 2002.
- Dörhöfer, G., & Jesopait, V.: Grundwasserneubildung und ihre Ermittlung—eine Anmerkung zum Beitrag von HÖLTING: Modellrechnungen zur Grundwasserneubildung. *Grundwasser*, 2(2), 77-80, doi.org/10.1007/s767-1997-8523-3, 1997.
- Dvory, N. Z., Livshitz, Y., Kuznetsov, M., Adar, E., and Yakirevich, A.: The effect of hydrogeological conditions on variability and dynamic of groundwater recharge in a carbonate aquifer at local scale. *J. Hydrol.*, 535, 480-494, doi.org/10.1016/j.jhydrol.2016.02.011, 2016.
- ESCWA-BGR: Inventory of shared water resources in Western Asia - Chapter 16 Western Aquifer Basin, UN-ESCWA (United Nations Economic and Social Commission for Western Asia) and BGR (Federal Institute for Geosciences and Natural Resources), Beirut, 23 pp., 2013, <http://waterinventory.org/groundwater/western-aquifer-basin>, last access: 14 May 2018.
- Ettlinger, H.: Spatial Analysis of extreme Storms and Floods in the Ayalon-Yarqon Catchment, Phys. Geogr. Dept., Inst. Earth Sci., Hebrew Univ, Jerusalem, 55 pp., 1996.

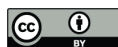

- Frumkin, A., Schwarz, H.P. and Ford D.C. : Evidence for isotopic equilibrium in stalagmites from caves in a dry region: Jerusalem, Israel, *Isr. J. Earth Sci.*, 43, 221-230, 1994.
- Geyer, T., Birk., S., Liedl, R., and Sauter, M.: Quantification of temporal distribution of recharge in karst systems from spring hydrographs, *J. Hydrol.*, 348, 452–463, 2008.
- 620 Goldschmidt, M. J. and Jacobs, M.: Precipitation over and replenishment of the Yarqon and Nahal Hatteninim underground catchments, Hydrological Paper 3, Hydrological Service of Israel, Jerusalem, 1958.
- Grodek, T., Lange, J., Lekach, J., and Husary, S.: Urban hydrology in mountainous middle eastern cities, *Hydrol. Earth Syst. Sci.*, 15, 953–966, doi:10.5194/hess-15-953-2011, 2011.
- GSI: Geological Map of Israel, Sheet 8-IV: Ramallah, Geological Map by: Shachnai, E., GSI - Geological Survey of Israel, Jerusalem, 2000, <http://www.gsi.gov.il/eng/?CategoryID=253&ArticleID=777>, last access: 16 March 2018.
- 625 GSI: Geological Map of Israel, Sheet 8-III: Lod, Geological Map by: Yechieli, Y., GSI - Geological Survey of Israel, Jerusalem, 2008, <http://www.gsi.gov.il/eng/?CategoryID=253&ArticleID=778>, last access: 16 March 2018.
- 630 Gunkel, A., Shadeed, S., Hartmann, A., Wagener, T. and Lange, J.: Model signatures and aridity indices enhance the accuracy of water balance estimations in a data-scarce Eastern Mediterranean catchment. *J. Hydrol.: Reg. Stud.*, 4, 487-501, doi.org/10.1016/j.ejrh.2015.08.002, 2015.
- Guttman, J., Goldshtoff, I., Baida, A. and Mercado, A.: A two-layer model of flow regime and salinity in the Yarqon-Tanimim Aquifer, *Tahal Consult. Eng.*, (Rep. 01/88/23), Tel Aviv, Israel, 19 pp., 1988.
- 635 Guttman, J.: Multi-Lateral Project B: Hydrogeology of the Eastern Aquifer in the Judea Hills and Jordan Valley, Mekorot Water Company, Report No. 468, Tel Aviv, Israel, 2000.
- Guttman, J., and Zukerman, H.: Yarqon-Tanimim-Beer Sheeba Basin, flow model, *Tahal Consult. Eng.*, Tel Aviv, Israel, 37 pp., 1995.
- Hargreaves, G. H. and Samani, Z. A.: Reference crop evapotranspiration from temperature, *Appl. Eng. Agr.*, 1, 96–99, 1985.
- 640 Hartmann, A., Lange, J., Weiler, M., Arbel, Y., and Greenbaum, N.: A new approach to model the spatial and temporal variability of recharge to karst aquifers, *Hydrol. Earth Syst. Sci.*, 16, 2219–2231, doi:10.5194/hess-16-2219-2012, 2012.
- HSI: Development of utilization and status of water resources in Israel until Autumn 2014, (in Hebrew), State of Israel. Water commission, Hydrological service, Annual report, Jerusalem, 509 pp., 2016, <http://water.gov.il/Hebrew/ProfessionalInfoAndData/Data-Hidrologeime/Pages/water-resources-2014.aspx>, last access: 17 May 2018.
- Hughes, A.G. and Mansour, M.M.: Recharge modeling for the West Bank aquifers, BGS - British Geological Survey, Commissioned Report, CR/05/087. Keyworth, Nottingham, UK, 90pp., 2005.
- 650 Hughes, A. G., Mansour, M. M., and Robins, N. S.: Evaluation of distributed recharge in an upland semi-arid karst system: the West Bank Mountain Aquifer, Middle East, *Hydrogeol. J.*, 16, 845–854, doi:10.1007/s10040-008-0273-6, 2008.
- IMS – Israel Meteorological Service: online database of the Israel Meteorological Service, Bet Dagan, <http://data.gov.il/ims/3>, last access: 1 October 2017.
- 655 Ireson, A. M. and Butler, A. P.: A critical assessment of simple recharge models: application to the UK Chalk, *Hydrol. Earth Syst. Sci.*, 17 (6), 2083, DOI:10.5194/hess-17-2083-2013, 2013.
- Lange, J., Greenbaum, N., Husary, S., Ghanem, M., Leibundgut, C., and Schick, A. P.: Runoff generation from successive simulated rainfalls on a rocky, semi-arid, Mediterranean hillslope, *Hydrol. Process.*, 17, 279–296, DOI:10.1002/hyp. 1124, 2003.
- 660 Lange, J., Arbel, Y., Grodek, T., and Greenbaum, N.: Water percolation process studies in a Mediterranean karst area, *Hydrol. Process.*, 24, 1866–1879, 2010.
- Lerner D.N., Issar, A.S. and Simmers, I.: Groundwater recharge. A guide to understanding and estimating natural recharge, *International Contributions to Hydrogeology*, Vol. 8, Verlag Heinz Heise, Hannover, 375 pp., 1990.
- 665 Limbrick, K. J.: Estimating daily recharge to the Chalk aquifer of southern England? a simple methodology, *Hydrol. Earth Syst. Sci. Disc.*, 6(3), 485-496, <hal-00304707>, 2002.
- Lloyd, J.W.: A review of various problems in the estimation of groundwater recharge, in: *Proc. Groundwater Recharge Conf.*, AWRC, Townsville, July 1980, pp. 1-25, 1980.



- Martínez-Santos, P. and Andreu, J. M.: Lumped and distributed approaches to model natural recharge in semiarid karst aquifers, *J. Hydrol.*, 388 (3-4), 389–398, doi.org/10.1016/j.jhydrol.2010.05.018, 2010.
- 670 Messerschmid, C.: Deep-seated aquicludes in a fractured carbonate environment, West Bank, in: Krásný, J., Hrkal, Z. and Bruthans, J. (eds.): International Conference on Groundwater in fractured rocks, IAHS, 15-19 September 2003, Prague, Czech Republic, 8 pp., 2003.
- Messerschmid, C., Kalbouneh, A., Zayed, O. and Sayfi, E.: Conceptual Model of Wadi Natuf Groundwater Recharge, Final Report – SUSMAQ-NAT # 64 V 0.3, Prepared by: SUSMAQ TEAM, Palestinian Water Authority, Palestine; Water Resource Systems Research Laboratory, University of Newcastle upon Tyne, UK; November 2003, Ramallah, 2003a.
- 675 Messerschmid, C., Aliewi, A., Kalbouneh, A., Sayfi, E. and Ziada, M.: Field trips to the springs in Wadi Natuf, Final Report – SUSMAQ-NAT # 65 V 0.1, Prepared by: SUSMAQ TEAM, Palestinian Water Authority, Palestine; Water Resource Systems Research Laboratory, University of Newcastle upon Tyne, UK; July 2003, Ramallah, 2003b.
- 680 Messerschmid, C.: Feedback between societal change and hydrological response in Wadi Natuf, a karstic mountainous watershed in the occupied Palestinian Westbank, *Proc. IAHS*, 364, 261-266, doi.org/10.5194/piahs-364-261-2014, 2014.
- 685 Messerschmid, C., Lange, J. and Sauter, M.: Assessment of transmission loss in a Mediterranean karstic watershed (Wadi Natuf, West Bank), *Hydr. Proc.*, 32(10), 1375-1390, doi.org/10.1002/hyp.11496, 2018.
- Peleg, N. and Gvirtzman, H.: Groundwater flow modeling of two-levels perched karstic leaking aquifers as a tool for estimating recharge and hydraulic parameters, *J. Hydrol.*, 388 (1-2), 13-27, doi.org/10.1016/j.jhydrol.2010.04.015, 2010.
- 690 Radulović, M.M., Stevanović, Z. and Radulović, M.: A new approach in assessing recharge of highly karstified terrains – Montenegro case studies. *Environ Earth Sci.*, 65 (8), 2221-2230, doi.org/10.1007/s12665-011-1378-0, 2011.
- Ries, F., Lange, J., Schmidt, S., Puhmann, H., and Sauter, M.: Recharge estimation and soil moisture dynamics in a Mediterranean, semi-arid karst region, *Hydrol. Earth Syst. Sci.*, 19, 1439-1456, doi.org/10.5194/hess-19-1439-2015, 2015.
- 695 Ries, F., Schmidt, S., Sauter, M. and Lange, J.: Controls on runoff generation along a steep climatic gradient in the Eastern Mediterranean, *J. Hydrol.: Reg. Stud.*, 9, 18–33, doi.org/10.1016/j.ejrh.2016.11.001, 2017.
- Rofe and Raffety Consulting Engineers: Jerusalem and District Water Supply: Geological and Hydrological Report, Report to the Central Water Authority of the Hashemite Kingdom of Jordan, Rofe and Raffety Consulting Engineers, London, Hashemite Kingdom of Jordan. Central Water Authority, Amman, 1963.
- 700 Rosenzweig, A.: Study of the difference in effects of forest and other vegetative covers on water yield, Final report, Project A-10-FS-13, State of Israel, Ministry of Agriculture, Soil Conservation and Drainage Division Research Unit, Rishon LeTsiyon, Israel, 1972.
- Rushton, K. R., Eilers, V. H. M. and Carter, R. C.: Improved soil moisture balance methodology for recharge estimation. *J. Hydrol.*, 318(1-4), 379-399, doi.org/10.1016/j.jhydrol.2005.06.022, 2006.
- 705 Sauter, M.: Quantification and Forecasting of Regional Groundwater Flow and Transport in a Karst Aquifer (Gallusquelle, Malm, SW. Germany), *Tübinger Geowissenschaftliche Arbeiten C13*, Tübingen, Germany, 1992.
- Sanz, E., Menéndez Pidal de Navascués, I., and Távara, C.: Calculating the average natural recharge in large areas as a factor of their lithology and precipitation, *Hydrol. Earth Syst. Sci. Discuss.*, 8, 4753–4788, doi:10.5194/hessd-8-4753-2011, 2011.
- 710 Scanlon, B. R., Healy, R.W., and Cook, P. G.: Choosing appropriate techniques for quantifying groundwater recharge, *Hydrogeol. J.*, 10, 18–39, doi:10.1007/s10040-002-0200-1, 2002.
- Scanlon, B. R., Keese, K. E. A., Flint, L., Flint, L. E., Gaye, C. B., Edmunds, W. M. and Simmers, I.: Global synthesis of groundwater recharge in semiarid and arid regions, *Hydrol. Processes*, 20(15), 3335–3370, doi:10.1002/hyp.6335, 2006.
- 715 Schmidt, S., Geyer, T., Guttman, J., Marei, A., Ries, F., and Sauter, M.: Characterisation and modelling of conduit restricted karst aquifers – example of the Auja spring, Jordan Valley, *J. Hydrol.*, 511, 750–763, 2014.
- Sheffer, N. A., Cohen, M., Morin, E., Grodek, T., Gimburg, A., Gvirtzman, H. and Frumkin, A.: Direct measurements of epikarst percolation in a dry Mediterranean environment, Sif Cave, Israel, *Eos Trans. AGU*, 89 (23), *Jt. Assem. Suppl.*, Abstract H33D-03, 2008.
- 720





- Sheffer, N. A., Dafny, E., Gvirtzman, H., Navon, S., Frumkin, A., and Morin, E.: Hydrometeorological daily recharge assessment model (DREAM) for the Western Mountain Aquifer, Israel: Model application and effects of temporal patterns, *Water Resour. Res.*, 46, W05510, doi:10.1029/2008WR007607, 2010.
- 725 Sheffer, N. A., Cohen, M., Morin, E., Grodek, T., Gimburg, A., Magal, E., Gvirtzman, H., Nied, M., Isele, D., and Frumkin, A.: Integrated cave drip monitoring for epikarst recharge estimation in a dry Mediterranean area, Sif Cave, Israel, *Hydrol. Process.*, 25, 2837–2845, doi:10.1002/hyp.8046, 2011.
- Simmers, I., (Ed.): *Estimation of Natural Groundwater Recharge*, D. Reidel Publishing Company, Dordrecht, Nederland, 510 pp., 1988.
- 730 Steinmann, A.: *Runoff generation in Mediterranean areas*, Dissertation, University of Freiburg i.Br; Hydrology Dept., Freiburg, Germany, 159 pp., 2010.
- SUSMAQ: Boundaries of the Western Aquifer Basin and the Eocene Aquifer in the Northeastern Aquifer Basin, SUSMAQ-MOD Report No. # 6.1 V1.0, The Sustainable Management for the West Bank and Gaza Aquifers, Palestinian Water Authority and University of Newcastle upon Tyne, UK, Ramallah, Palestine, 56 pp., 2001, [http://www.hwe.org.ps/Projects/SUSMAQ\\_Reports/FlowModeling/Boundaries.pdf](http://www.hwe.org.ps/Projects/SUSMAQ_Reports/FlowModeling/Boundaries.pdf), last access: 2 April 2015.
- 735 SUSMAQ: Compiled Base Data for the Numerical Groundwater Flow Model of the Western Aquifer Basin. Volume 1 - General Background, SUSMAQ-MOD Report No. #07 V0.4, The Sustainable Management for the West Bank and Gaza Aquifers, Palestinian Water Authority and University of Newcastle upon Tyne, UK, Ramallah, Palestine, 306 pp., 2002.
- 740 SUSMAQ: Steady State and Transient Flow Models of the Western Aquifer Basin, SUSMAQ-MOD Report No. #49 V0.1, The Sustainable Management for the West Bank and Gaza Aquifers, Palestinian Water Authority and University of Newcastle upon Tyne, UK, Ramallah, Palestine, 174 pp, 2005.
- Weinberger, G., Rosenthal, E., Ben-Zvi, A., and Zeitoun, D. G.: The Yarkon-Taninim groundwater basin, Israel hydrogeology: case study and critical review, *J. Hydrol.*, 161, 227–255, 1994.
- 745 Weiss, M. and Gvirtzman, H.: Estimating ground water recharge using flow models of perched karstic aquifers, *GroundWater*, 45, 761–773, 2007.

**Table 1.a.** Soil moisture measurement data by location (in mm and %)

|                      | Beitilla,<br>garden | Shuqbah,<br>grassland | Wadi Zarqa, fields<br>upper terrace |         | Kufr Fidiyah, field<br>KF-W |           | Ras Karkar, terraces<br>RK-W |         |
|----------------------|---------------------|-----------------------|-------------------------------------|---------|-----------------------------|-----------|------------------------------|---------|
| # years measured     | 1                   | 1                     | 1                                   | 1       | 2                           | 1         | 4                            | 2       |
| years measured       | 3/4                 | 3/4                   | 5/6                                 | 4/5     | 5/6-6/7                     | 6/7       | 5/6-8/9                      | 7/8-8/9 |
| formation            | I-Yat               | Jerus                 | Top I-UBK (u-UBK)                   |         | Top I-UBK                   |           | Heb                          |         |
| soil depth (mm)      | 500                 | 320                   | 770                                 | 400     | 650                         | 940       | 400                          | 400     |
| sensor depth (mm)    | 110/110/430         | 110/190               | 420/660/750                         | 170/360 | 130/180/390                 | 50/75/175 | 50/140/320                   | 100/200 |
| SM peak (mm)         | 149                 | 44                    | 175                                 | 93      | 232                         | 234       | 119                          | 127     |
| FC (mm)              | 179                 | 60                    | 172                                 | 132     | 253                         | 237       | 129                          | 129     |
| WP (%)               | 8 %                 | 10 %                  | 6.5 %                               | 16.1 %  | 10.5 %                      | 0.5 %     | 4.2 %                        | 4.2 %   |
| WP (mm)              | 40                  | 20                    | 50.05                               | 64.4    | 68.25                       | 4.7       | 16.8                         | 16.8    |
| FC <sub>e</sub> (mm) | 139                 | 40                    | 121.5                               | 67.5    | 185                         | 232.5     | 112.5                        | 112.5   |

750

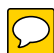

**Table 1.b.** Outcrop (recharge) area, rainfall and recharge potential of the leaky perched aquifers and the main regional aquifers

| Formation                           | u-Yat | l-Yat  | u-UBK | l-UBK | “Upper Aquifer”* | “Lower Aquifer”* |
|-------------------------------------|-------|--------|-------|-------|------------------|------------------|
| Area km <sup>2</sup>                | 4.931 | 10.182 | 2.442 | 8.441 | 36.732           | 29.556           |
| Ø Rain 2003–10 <sup>1</sup> (mcm/a) | 2.917 | 6.145  | 1.502 | 5.262 | 20.696           | 18.452           |
| Potential                           | ---   | +      | +     | +     | ++               | ++               |

<sup>1</sup> average precipitation between 2003/04 and 2009/10

\* “Upper Aquifer” stands for Hebron, Betlehem and Jerusalem formations; “Lower Aquifer” for upper and lower UBK formations.

755



**Table 2.** Direct percolation/recharge (DP) rates, modelled at representative SM locations & litho-facies

| (mm/yr)<br>SM-Infiltr'n (DP) | Rainfall <sub>(Natuf)</sub><br>ø area | DP<br>Bet | DP<br>Shuqbah | DP<br>WZ-hh | DP<br>WZ-up.T | DP<br>KF-W | DP<br>KF-E | DP<br>RK-W | DP<br>RK-E |
|------------------------------|---------------------------------------|-----------|---------------|-------------|---------------|------------|------------|------------|------------|
| 2003/04                      | 529                                   | 291       | 289           | 235         | 188           | 140        | 238        | 238        | 217        |
| 2004/05                      | 742                                   | 475       | 519           | 465         | 452           | 405        | 442        | 442        | 448        |
| 2005/06                      | 621                                   | 319       | 293           | 223         | 192           | 145        | 218        | 218        | 206        |
| 2006/07                      | 632                                   | 319       | 331           | 277         | 241           | 194        | 278        | 278        | 259        |
| 2007/08                      | 496                                   | 287       | 293           | 239         | 196           | 149        | 240        | 240        | 221        |
| 2008/09                      | 565                                   | 258       | 251           | 197         | 165           | 118        | 204        | 204        | 180        |
| 2009/10                      | 582                                   | 286       | 299           | 245         | 208           | 160        | 247        | 247        | 228        |
| average DP/rech              | –                                     | 251       | 319           | 325         | 269           | 235        | 187        | 266        | 266        |
| Av. P (*3/4–9/10)            | –                                     | 601       | 557           | 601         |               | 631        |            | 588        |            |
| sub-catchment                | –                                     | ø WZ/S1   | ø Nea/S1      | ø WZ/S1     |               | Wadi Zarqa |            | ø Ayb/S2   |            |
| /ø P                         | –                                     | 42 %      | 57 %          | 54 %        | 45 %          | 37 %       | 30 %       | 45 %       | 45 %       |

Note: The deep percolation / recharge rate (DP) was modelled with the respective sub-catchment rainfall on a daily basis. This table shows spatially averaged rainfall (ø 595 mm/yr during 03/04–09/10). Water balance and leakage calculations for the perched aquifers and the ranked formation recharge throughout Wadi Natuf used this area rainfall (Table 6).

760



**Table 3.** Formation-specific recharge coefficients (RC) in Wadi Natuf (Alt.-2,7, am-basins)

| Formation age <sup>1</sup> | name         | Potential Rank Type |    | Area km <sup>2</sup> | Ø Precipitation    |             | Recharge Alt.-2 |                    |             | Recharge Groups    |      |            | Group-RC Σ Natuf |                 |
|----------------------------|--------------|---------------------|----|----------------------|--------------------|-------------|-----------------|--------------------|-------------|--------------------|------|------------|------------------|-----------------|
|                            |              |                     |    |                      | Mm <sup>3</sup> /a | mm/a        | RC, %           | Mm <sup>3</sup> /a | mm/a        | Mm <sup>3</sup> /a | mm/a | fraction % |                  |                 |
| 1                          | Alluvial     | ++                  | 0  | Alluv.               | 1.5                | <b>0.8</b>  | 553             | 57.3 %             | <b>0.5</b>  | 317                | 0.5  | 317        | <b>2 %</b>       | <b>57.3 %</b>   |
| 12                         | l-LBK        | +++                 | 1  |                      | 16.4               | <b>10.2</b> | 624             | 57.3 %             | <b>5.9</b>  | 358                |      |            |                  |                 |
| 3                          | Jerusalem    | +++                 | 2  | ++                   | 9.3                | <b>5.1</b>  | 549             | 57.3 %             | <b>2.9</b>  | 315                |      |            |                  |                 |
| 11                         | u-UBK        | ++                  | 3  | Aquifer              | 13.2               | <b>8.2</b>  | 624             | 54.1 %             | <b>4.4</b>  | 338                | 15.8 | 324        | <b>59 %</b>      | <b>54.0 %</b>   |
| 6                          | Hebron       | ++                  | 4  |                      | 10.1               | <b>5.8</b>  | 574             | 45.3 %             | <b>2.6</b>  | 260                |      |            |                  |                 |
| 9                          | u-UBK        | +                   | 5  |                      | 2.4                | <b>1.5</b>  | 615             | 54.1 %             | <b>0.8</b>  | 333                |      |            |                  |                 |
| 10                         | l-UBK        | ±                   | 6  | +                    | 8.4                | <b>5.3</b>  | 623             | 44.7 %             | <b>2.4</b>  | 279                | 7.4  | 262        | <b>28 %</b>      | <b>44.7 %</b>   |
| 4                          | u-Betl.      | ±                   | 7  | Aquifer              | 7.7                | <b>4.3</b>  | 557             | 45.3 %             | <b>1.9</b>  | 252                |      |            |                  |                 |
| 5                          | l-Betl.      | -                   | 8  |                      | 9.8                | <b>5.6</b>  | 571             | 41.8 %             | <b>2.3</b>  | 239                |      |            |                  |                 |
| 14                         | Ein Qinya    | ±                   | 9  | ± Aquifer            | 1.8                | <b>1.1</b>  | 613             | 45.3 %             | <b>0.5</b>  | 278                | 3.1  | 256        | <b>11 %</b>      | <b>42.3 %</b>   |
| 8                          | l-Yatta      | --                  | 10 | tard                 | 10.2               | <b>6.1</b>  | 603             | 41.8 %             | <b>2.6</b>  | 252                |      |            |                  |                 |
| 2                          | Senon., Apt. | ---                 | 11 | - Aquifer            | 7.0                | <b>4.1</b>  | 595             | 0 %                | <b>0.0</b>  | 0                  | 0    | 0          | <b>0 %</b>       | <b>0 %</b>      |
| 7                          | u-Yatta      | ---                 | 12 | clude                | 4.9                | <b>2.9</b>  | 592             | 0 %                | <b>0.0</b>  | 0                  | 0    | 0          | <b>0 %</b>       | <b>0 %</b>      |
| <b>Total</b>               |              |                     |    |                      | <b>102.6</b>       | <b>61.1</b> | <b>595</b>      |                    | <b>26.8</b> | <b>261</b>         | 26.8 | 261        | <b>100 %</b>     | <b>(43.9 %)</b> |

<sup>1</sup> the original ranking of age goes from most recent (alluvial = 1) to the oldest (Albian Ein Qinya = 14)



765 **Table 4.** Alternative scenarios of total recharge in Wadi Natuf – (WAB only)

| Scenario             | unit             | Recharge – all Natuf (WAB) |                          |                           |
|----------------------|------------------|----------------------------|--------------------------|---------------------------|
|                      |                  | Alt.-2<br>soil-based       | Alt.-1<br>landform-based | Alt.-3<br>lithology-based |
| Recharge             | mcm/yr           | 26.8 (22.6)                | 24.1 (20.6)              | 28.1 (23.9)               |
| Area                 | km <sup>2</sup>  | 102.6 (85.5)               |                          |                           |
| Recharge             | l/m <sup>2</sup> | 0.26 (0.26)                | 0.23 (0.24)              | 0.27 (0.28)               |
| Recharge             | mm/yr            | 261.4 (264.2)              | 234.8 (241.4)            | 274.1 (279.8)             |
| Avg. Precipitation   | mm/yr            | 595                        |                          |                           |
| Recharge Coefficient | %                | 43.8 % (44.6 %)            | 39.4 % (40.8 %)          | 46.1 % (47.3 %)           |



**Table 5.** Annual spring groups discharge (and sub-catchment recharge)

| Symbol                               |  |  |  |  |  |              | RAIN          |
|--------------------------------------|-----------------------------------------------------------------------------------|-----------------------------------------------------------------------------------|-----------------------------------------------------------------------------------|-----------------------------------------------------------------------------------|------------------------------------------------------------------------------------|--------------|---------------|
| Spring group<br>(m <sup>3</sup> /yr) | Wadi<br>Zarqa                                                                     | Zarqa<br>Bridge                                                                   | Beitillu,<br>Harat Al-Wad                                                         | Shakha-<br>reek                                                                   | Nabi<br>Aneer                                                                      | Ain<br>Ayoub | Wadi<br>Zarqa |
| Formation                            | UBK <sup>(1)</sup>                                                                |                                                                                   | upper UBK                                                                         |                                                                                   | lower Yatta                                                                        |              | –             |
| <b>2003/04</b> (m <sup>3</sup> /a)   | 145.314                                                                           | 7.942                                                                             | 31.102                                                                            | 69.049                                                                            | 5.122                                                                              | 11.372       | –             |
| <b>2003/04*</b> (mm/a)               | 79                                                                                | 74                                                                                | 25                                                                                | 52                                                                                | 26                                                                                 | 52           | 485           |
| 2004/05 (max P.)                     | 101                                                                               | 94                                                                                | 32                                                                                | 66                                                                                | 33                                                                                 | 66           | 617           |
| 2005/06                              | 89                                                                                | 83                                                                                | 28                                                                                | 58                                                                                | 29                                                                                 | 58           | 547           |
| 2006/07                              | 87                                                                                | 81                                                                                | 28                                                                                | 57                                                                                | 28                                                                                 | 57           | 533           |
| 2007/08                              | 73                                                                                | 68                                                                                | 23                                                                                | 48                                                                                | 24                                                                                 | 48           | 447           |
| 2008/09 (min P.)                     | 71                                                                                | 66                                                                                | 23                                                                                | 46                                                                                | 23                                                                                 | 46           | 435           |
| 2009/10                              | 79                                                                                | 74                                                                                | 25                                                                                | 52                                                                                | 26                                                                                 | 52           | 487           |
| 2010/11                              | 71                                                                                | 67                                                                                | 23                                                                                | 47                                                                                | 23                                                                                 | 47           | 447           |
| 2011/12 (mm/a)                       | 105                                                                               | 98                                                                                | 33                                                                                | 68                                                                                | 34                                                                                 | 69           | 656           |
| <b>Ø 3/4-9/10 (mm/a)</b>             | <b>83</b>                                                                         | <b>77</b>                                                                         | <b>26</b>                                                                         | <b>54</b>                                                                         | <b>27</b>                                                                          | <b>54</b>    | <b>507</b>    |
| Ø 3/4-9/10 (m <sup>3</sup> /a)       | 152.068                                                                           | 8.311                                                                             | 32.547                                                                            | 72.258                                                                            | 5.360                                                                              | 11.901       | –             |
| Rech. area (km <sup>2</sup> )        | 1.84                                                                              | 0.108                                                                             | 1.24                                                                              | 1.34                                                                              | 0.20                                                                               | 0.22         | –             |
| Rech. 03/04 (m <sup>3</sup> /a)      | 398.704                                                                           | 28.295                                                                            | 324.870                                                                           | 271.467                                                                           | 52.398                                                                             | 44.569       | –             |
| Rech. 03/04 (mm/a)                   | 217                                                                               | 262                                                                               | 262                                                                               | 203                                                                               | 262                                                                                | 203          | 485           |
| <b>Q / R 03/4 (%)</b>                | <b>36 %</b>                                                                       | <b>28 %</b>                                                                       | <b>10 %</b>                                                                       | <b>25 %</b>                                                                       | <b>10 %</b>                                                                        | <b>26 %</b>  | –             |

\*Reference year 2003/04; reference rainfall station: Tipping bucket at Wadi Zarqa. Within modelling period (2003/04-09/10): maximum flow in 2004/05, minimum flow in 2008/09. <sup>(1)</sup> UBK formation here comprises of two sub-formations and main spring horizons: upper UBK the top of lower UBK (compare with Figures 1b and 7). In blue / grey shaded: area normalised rates in mm/a

770

**Table 6.** Water balance of the intermediate leaky aquifers in Wadi Natuf – Recharge, spring discharge and leakage rates

| Formation    |                 | lower Yatta | upper UBK | Top of lower UBK | $\Sigma$ intermediate leaky aquifers |
|--------------|-----------------|-------------|-----------|------------------|--------------------------------------|
| Area         | km <sup>2</sup> | 10.2        | 2.4       | 0.8              | 13.5                                 |
| Rainfall (P) | mcm/a           | 6.1         | 1.5       | 0.5              | 8.0                                  |
|              | mcm/a           | 2.5         | 0.8       | 0.2              | 3.5                                  |
| Recharge (R) | mm/a            | 249         | 322       | 266              | 263                                  |
|              | (R ÷ P)         | 42 %        | 54 %      | 45 %             | 44 %                                 |
|              | mcm/a           | 1.9         | 0.7       | 0.1              | 2.7                                  |
| Leakage (L)  | mm/a            | 185         | 287       | 169              | 203                                  |
|              | (L ÷ R)         | 75 %        | 89 %      | 64 %             | 77 %                                 |
|              | mcm/a           | 0.645       | 0.086     | 0.082            | 0.813                                |
| Springs (Q)  | mm/a            | 63          | 35        | 97               | 60                                   |
|              | (Q ÷ R)         | 25 %        | 11 %      | 36 %             | 23 %                                 |

775

Note: In this calculation, the discharge rates are applied to the total outcrop areas of the intermediate leaky aquifers in Wadi Natuf, not only to the spring group areas. Leakage and spring discharge fractions are related to total recharge from the soil moisture models (as 100 %), while recharge coefficients are related to total rainfall (here average area rainfall of Wadi Natuf).



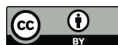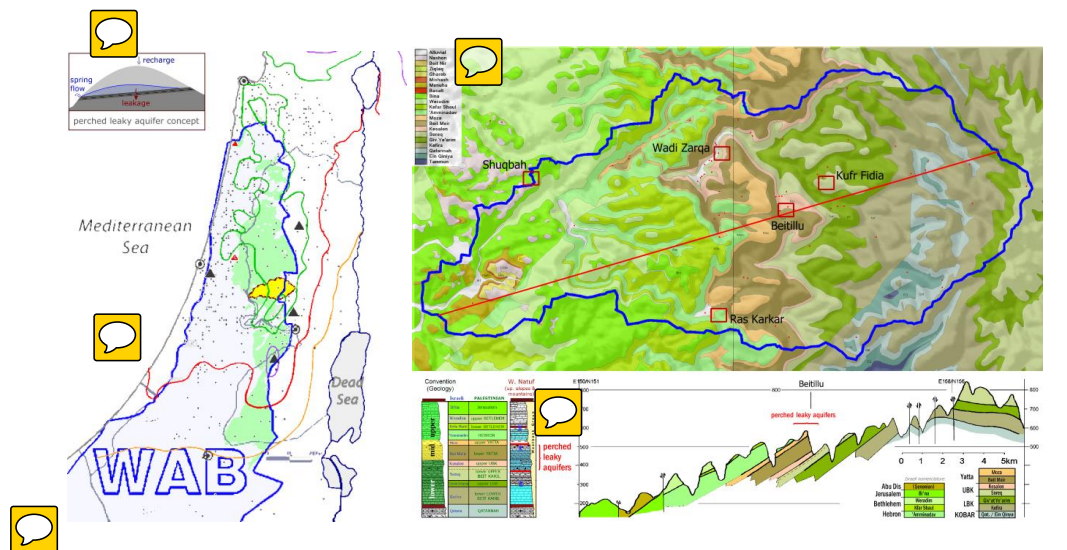

780 **Figure 1.a.** Left – Location map and concept inset; Wadi Natuf (yellow) positioned in the mountains and slopes of the WAB; WAB boundary, aquifer outcrop area (green), isohyets, rainfall stations, main weather station, main spring outlets (modified after Ettinger, 1996) and schematic concept of perched, leaky aquifers; **Figure 1.** Right – Geological relief map, cross-section, main springs and soil moisture locations (red boxes) (Sources: geological map modified after GSI, 2000, 2008; stratigraphic column modified after (Dafny et al. 2010).

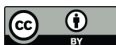

785

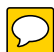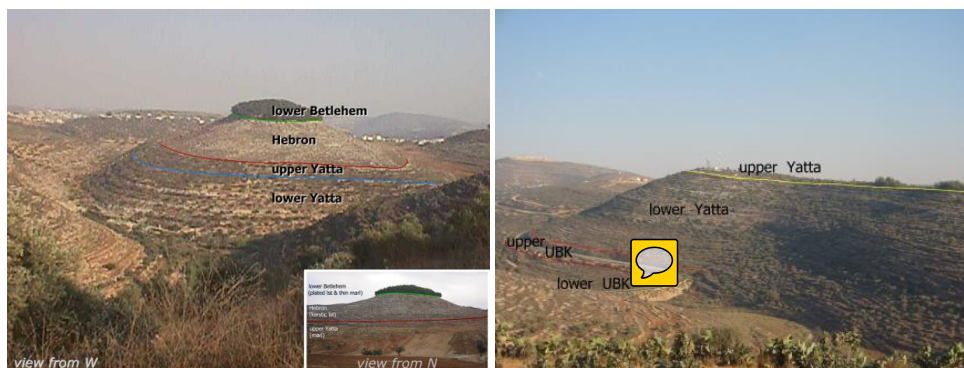

790 **Figure 2.a & 2.b.** Correlation of landform and lithology; left: Nabi Ghayth hill, west of Beitillu; right: Nabi  
Aneer spring group. Note: The karstic limestone of Hebron formation forms outcrops with thin soil cover, bare  
rock or karren fields and tends to erode into steeper slopes above the soft, mostly eroded upper Yatta formation –  
the only true aquiclude within the Westbank Group (with levelled agricultural plains in the inlet photo in Fig. 1a).  
By contrast, the top of the hill is formed by lower Betlehem formation, a thinly plated coloured limestone  
795 ensemble with fine marl interbedding that lacks karstification and promotes soil development and natural  
vegetation.

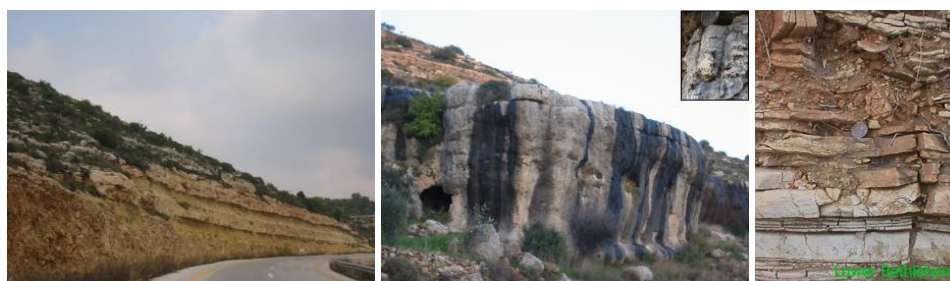

800 **Figure 3.a.** Twin marl band 2.5km SE of Beitillu (confining layer beneath the top of lower UBK formation); **Figure 3.b.** Cliff-forming coral reef limestone of upper UBK formation at Wadi Zarqa with high primary porosity but also signs of karstification; **Figure 3.c.** Colourful, thinly plated limestone with fine marl intercalations (lower Betlehem formation)

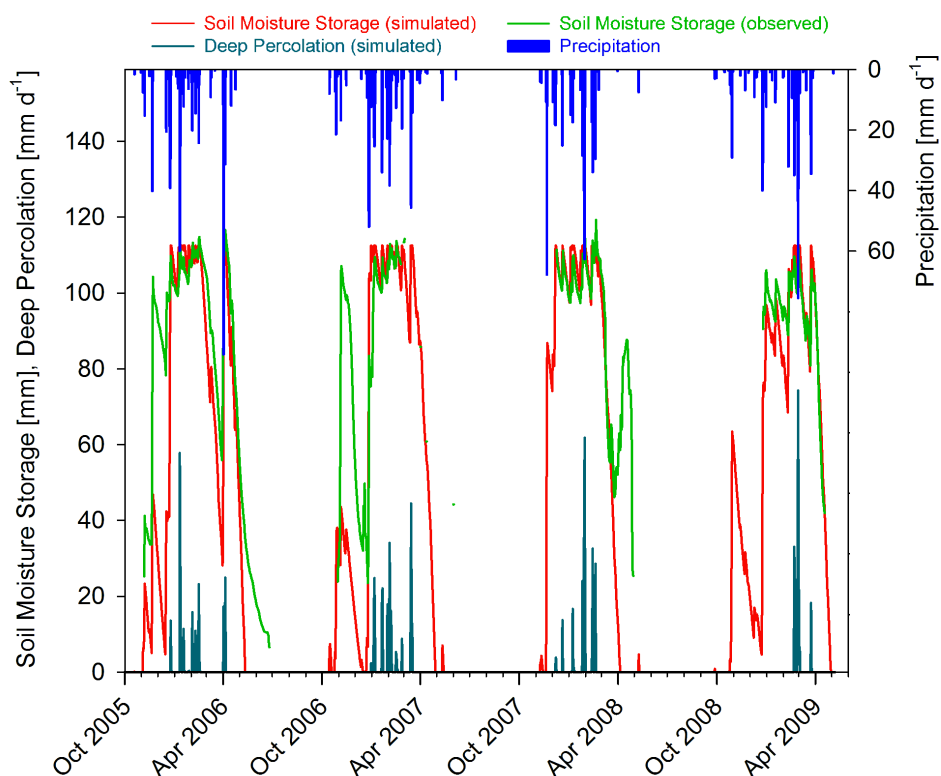

**Figure 4.** Comparison between observed and modelled available soil moisture (AW) at Ras Karkar, West (RK-W) during four seasons; in this profile  $FC_e$  was set to 112.5 mm. Note: In this station (RK-W), unlike in the other stations, the modelled graph (red) showed a delay in the filling of the soil column at the onset of the rainfall season. (The other stations, like WZ & KF, showed a good match in season onset, or were not fully recorded in early winter, like BET & SHU). A time lag in the measured response at the end of the season was only observed at WZ-hh and KF-W, and for one season also at RK-W, see April 2008, above.

810

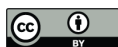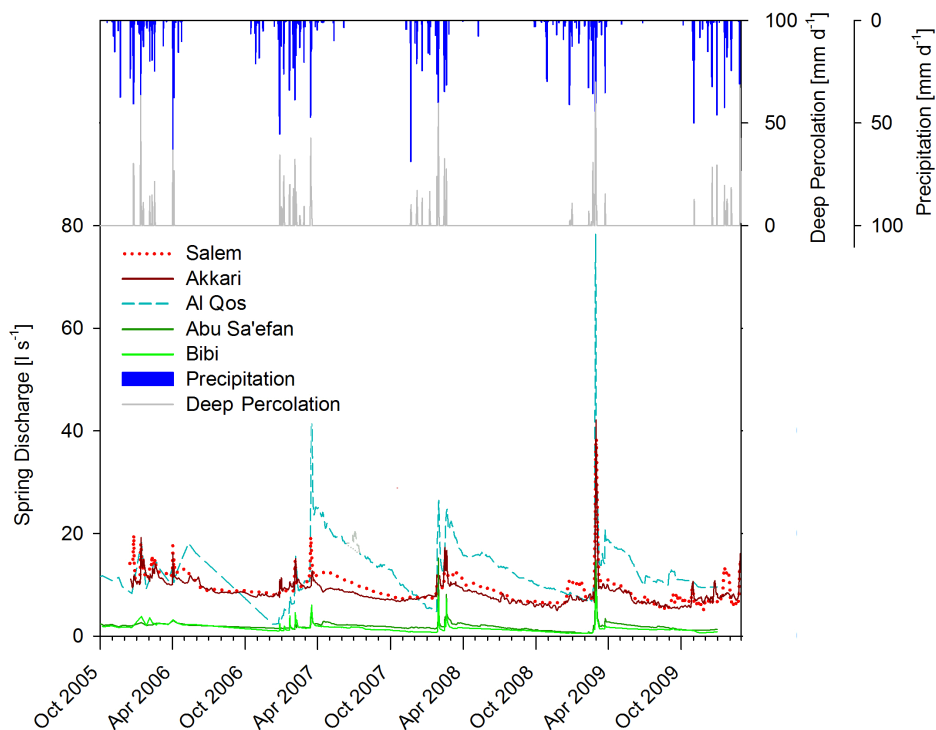

**Figure 5.** (DP vs. Q): Beitillu – Rainfall, spring flow and recharge during three seasons. Note: Recharge (DP) values as green bars; daily spring flow as red, blue and yellow lines; daily rainfall as blue bars from top x-axis. The access pipe of Al-Qos spring was cleaned from plant roots in summer 2007, causing a temporary increase in spring discharge.

815

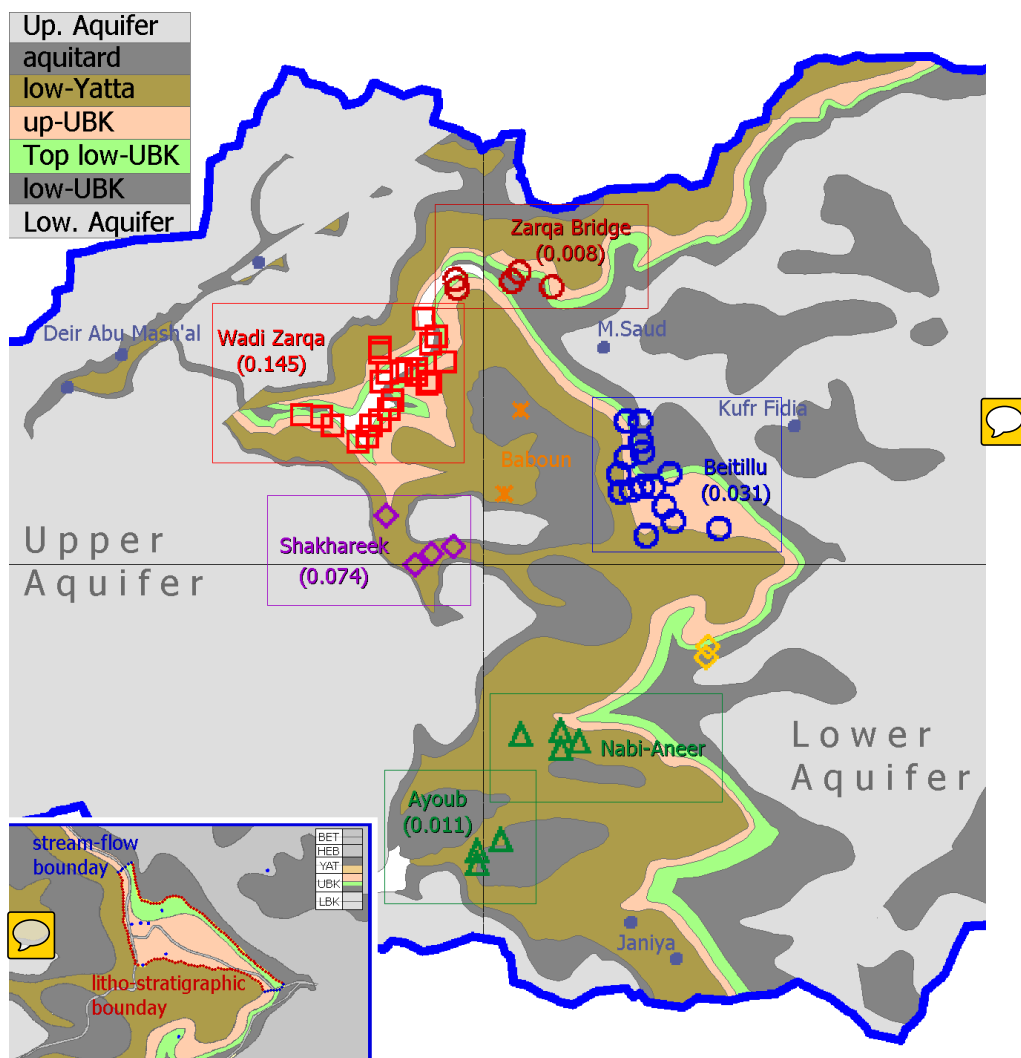

**Figure 6: Spring groups in Wadi Natuf** Note: Six spring groups were identified in central Natuf, with two in the North (Zarqa), two in the centre (Beitillu & Shakhareek) and two in the South ('Ayoub & Nabi Aneer). The recharge areas of these perched intermediate aquifers are isolated by outcropping bottom aquicludes (Figures 2a, b and 3a). Source: geological map based on GSI, 2000, 2008

820

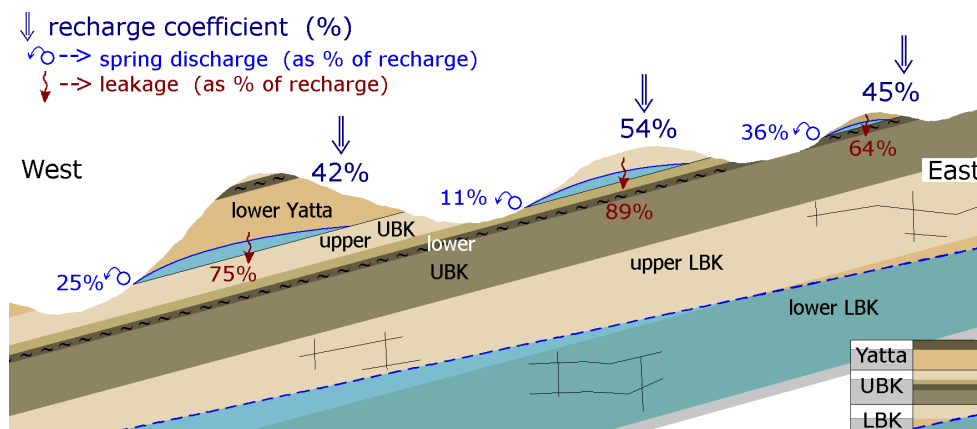

Figure 7: Water budget of the three leaky sub-aquifers in Wadi Natuf (as percentage of rainfall)



825

## APPENDIX A

**Table A1.** Soil depth matrix

| Hydrostratigraphy<br>Geological formation              | Upper Aquifer<br>Heb., Bet., Jer. | Yatta<br>up UBK, Yatta | Lower Aquifer<br>LBK, low UBK* |
|--------------------------------------------------------|-----------------------------------|------------------------|--------------------------------|
| <b>A) Terraces</b>                                     |                                   |                        |                                |
| 1. terraces with olives                                | 65, 40 cm                         | 42, 25 cm              | (49), 26 cm                    |
| 2. terraces with other types cultivation               | NA                                | (25)                   | NA                             |
| 3. formerly used but now uncultivated terraces         | NA                                | 12, 47                 | 46, 51, 22                     |
| 4. natural terracing with shrubs and grass cover       | (26) 40                           | 10                     | 22, 29                         |
| <b>B) Plains</b>                                       |                                   |                        |                                |
| 1. arable plains with olive orchards                   | 63, 67                            | 94                     | 26                             |
| 2. arable plains with other types of cultivation       | 36                                | (56), 50, 65, 77       | 40                             |
| 3. arable plains without cultivation                   | (58)                              | 56                     | NA                             |
| 4. rock plastered plains (karstification)              | 32                                | NA                     | (5), 15                        |
| 5. dry plains with shrubs and grass cover              | 19                                | NA                     | 19                             |
| <b>C) Slopes</b>                                       |                                   |                        |                                |
| 1. non-terraced slopes with olives                     | NA                                | 56                     | 49                             |
| 2. non-terraced slopes with other types of cultivation | 58                                | 50                     | NA                             |
| 3. slopes with shrubs and grass cover                  | 11, 26, 32                        | 40                     | 18                             |
| 4. rock plastered slopes                               | 32                                | NA                     | 11                             |
| <b>D) Pure rock cover and cliffs</b>                   |                                   |                        |                                |

Notes: \* excl. Top l-UBK, (grey fill) = main landform types, red = SM meas. location, NA = untypical landform for lithology,

830





**Table A2.** Data coverage of daily spring flow measurements

| Year           | A. Sa'efan | Bibi  | Qos   | Salem | 'Akkari | $\Sigma$ Coverage |
|----------------|------------|-------|-------|-------|---------|-------------------|
| 2003/04        | 57 %       | 35 %  | 54 %  | 58 %  | 58 %    | 35–58 %           |
| 2004/05        | 2 %        | 2 %   | 2 %   | 2 %   | 2 %     | 2 %               |
| 2005/06        | 5 %        | 5 %   | 5 %   | 79 %  | 79 %    | 5 % & 79 %        |
| <b>2006/07</b> | 100 %      | 100 % | 100 % | 100 % | 100 %   | <b>full</b>       |
| <b>2007/08</b> | 100 %      | 100 % | 100 % | 100 % | 100 %   | <b>full</b>       |
| <b>2008/09</b> | 100 %      | 100 % | 100 % | 100 % | 100 %   | <b>full</b>       |
| 2009/10        | 42 %       | 42 %  | 42 %  | 68 %  | 68 %    | 42 % + 68 %       |



**Table A3.** Outcrop (recharge) area, rainfall and recharge potential of all formations

| Age                  | 1      | 12     | 3          | 11     | 6      | 9     | 10        | 4     | 5     | 14         | 8      | 2            | 7     |
|----------------------|--------|--------|------------|--------|--------|-------|-----------|-------|-------|------------|--------|--------------|-------|
| Fm name              | Alluv. | I-LBK  | Jerus      | u-LBK  | Heb    | u-UBK | I-UBK     | u-Bet | I-Bet | E.Qinya    | I-Yat  | Senon, Apt   | u-Yat |
| symbol               | AI     | klk    | kub        | kugy   | kuu    | kuke  | kus       | kuw   | kuks  | kleq       | kubm   | kuez,klq,klt | kumo  |
| Area km <sup>2</sup> | 1,535  | 16,398 | 9,258      | 13,158 | 10,056 | 2,442 | 8,441     | 7,651 | 9,766 | 1,820      | 10,182 | 7,005        | 4,931 |
| Ø P, mcm/a           | 0,848  | 10,236 | 5,086      | 8,215  | 5,776  | 1,502 | 5,262     | 4,260 | 5,574 | 1,115      | 6,145  | 4,165        | 2,917 |
| Potential            | ++     | +++    | +++        | ++     | ++     | +     | +         | +     | -     | +          | --     | ---          | ---   |
| Rank                 | 0      | 1      | 2          | 3      | 4      | 5     | 6         | 7     | 8     | 9          | 10     | 11           | 12    |
| Type                 | Alluv. |        | ++ Aquifer |        |        |       | + Aquifer |       |       | ± Aquitard |        | - Aquitard   |       |

835 This table is an expanded version of Table 1b. It lists each formation separately by area, rain and ranking position/recharge potential. Note: Ein Qinya formation is a local aquifer, which however does not belong to any of the regional aquifer basins. Its recharge potential does not form part of the water-balance calculations. Rainfall shows the multiannual average precipitation, calculated with rainfall of the respective sub-catchments.

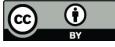

**Table A4.** Recharge coefficients in the literature

| author               | year | avg         | max    | area       | time   | based on   | how                                            | method                          | misc                                                                           |
|----------------------|------|-------------|--------|------------|--------|------------|------------------------------------------------|---------------------------------|--------------------------------------------------------------------------------|
| Sheffer et al.       | 2010 | 9-40%       | (52 %) | Mt.Aq.     | annual | model      | calibrated numerical water budget model        | daily soil saturation           | non-empirical assumed FC (low) and soil thickness (high)                       |
| Gunkel et al.        | 2015 | 30 %        | -      | Mt.Aq.     | annual | model      | distributed, field-based, water balance model  | TRAIN-ZIN, MOSST                | EAB, Wadi Fari'a + Jordan Valley, 6-yr measurement period, event-based         |
| Sanz et al.          | 2011 | 34.3 %      | 34.3 % | Spain      | annual | hydrology  | clay 1.3 %, silt 3.3 %, ls+dl 34.4 %           | large areas, SMD + HEP          | as factor of lithology & precipitation                                         |
| Cheng et al.         | 2017 | -           | 42 %   | China      | event  | thick soil | max annual: 32.4 %                             | >2m thick soils                 | in one event                                                                   |
| Bradford et al.      | 2002 | 39-45 %     | 45 %   | UK Chalk   | annual | models     | with input data at varying spatial resolutions | SMD + HEP methods               | UK Chalk, 4 yrs                                                                |
| Natv et al.          | 1995 | 8-55 %      | -      | N Negev    | annual | brinide    | in boreholes in fractured chalk                | bromide profiles                | arid desert climate (P: 200mm/a)                                               |
| Absaradab            | 2011 | 36 %        | 53.2 % | Mt.Aq.     | annual | flow model | WAB basin-wide water budget                    | 3-dimensional flow model        | max. recharge in 2003/04                                                       |
| Dvory et al.         | 2016 | 34 %        | 54.3 % | Mt.Aq.     | annual | model      | L-D dual porosity model (linear)               | SMD-GW model, spring response   | local, W of Jerusalem, spatial litho-based differences (abs. maximum: 73.7 %)  |
| Schmidt et al.       | 2014 | 25-50 %     | 55 %   | Mt.Aq.     | annual | spatial    | Rain, Eip (spring flow) data                   | SM model, budget                | EAB at 'Aqia spring                                                            |
| Sheffer et al.       | 2010 | 20-60 %     | 66 %   | Mt.Aq.     | annual | formula    | quotes literature on WAB-RC                    | quasi-3-D flow model            | calibrated numerical annual water budget (non-empirical), linear equation      |
| Ries et al.          | 1988 | 33 %        | 75.3 % | Mt.Aq.     | annual | model      | max. in wet years (avg. in Aujah)              | quasi-3-D flow model            | EAB (mountains and slopes)                                                     |
| Gutman et al.        | 1991 | 30.6 %      | -      | Mt.Aq.     | annual | model      | WAB basin-wide water budget                    | ranked system and matrix        | max. recharge in 1991/92 ( <i>single-cell water balance model</i> )            |
| Weiss & Gvirtzman    | 2007 | 6-65 %      | -      | Mt.Aq.     | annual | formula    | of Gutman ('00) G. & Zuckerman ('95)           | empir. model, linear regression | applying formula to 4 spring areas, one of which overlaps with Wadi Nauf       |
| Radtlovic et al.     | 2011 | 66.3-76.2 % | 76.2 % | Montenegro | annual | spatial    | water budget & other methods (Montenegro)      | model, budgets, spring response | karst, lithology, structure, landform, runoff, plans, climate, soil, slope     |
| Altoona et al.       | 2014 | 50-79 %     | 79 %   | S-luly     | annual | hydrology  | precipitation & air temperature                | air temp., ET & rain            | correlated with other factors: karst outcrops, morphology, land use, soil type |
| Goldschneider & Drew | 2012 | -           | >80 %  | -          | event  | spatial    | bare karstified limestones                     | -                               | summary from literature                                                        |
| Weiss & Gvirtzman*   | 2007 | <10-80 %    | 91 %   | Mt.Aq.     | annual | hydrology  | max. in 1988 at ELBK fm.                       | model, budgets, spring response | 28-yr 6 RC of 47.2 % at Ein Al-Harrashah spring groundwater catchment          |
| Altoona              | 2015 | 35-97 %     | 97 %   | Appenin    | event  | model      | storms-by-storm, Apennine                      | -                               | -                                                                              |
| Shawcui              | 1965 | 47 %        | -      | Mt.Aq.     | annual | spatial    | Mt Carmel avg. (undifferentiated)              | -                               | (quote after Lerner et al., 1990)                                              |
| Mercu                | 1958 | 53 %        | -      | Mt.Aq.     | annual | spatial    | Na'aman spring                                 | -                               | while at forest 0 %                                                            |
| Rosenzweig           | 1972 | 60 %        | -      | Mt.Aq.     | annual | landform   | Mt Carmel avg. (by landform)                   | annual on pasture/grassland     | -                                                                              |
| Messerschmid et al.  | 2018 | 40.8-47.3 % | -      | Mt.Aq.     | annual | 3 scenario | here: alt: 2: soil-based scenario              | SM model, ranking               | WAB in Wadi Nauf                                                               |

Note: \* for the groundwater catchment of Ein Al-Harrashah spring, which overlaps with Nauf surface catchment, Weiss & Gvirtzman (2007) reported a 28-year average recharge coefficient of 47.2 %.



**Table A5.** Recharge coefficients in alternative scenarios A.-1 and A.-3 (landform & lithology based)

| Type        | Potential | Symbol           | RC (%) |        | Recharge (mcm/a) |      | Group recharge (mcm/a) |      | Group fraction (%) |        | Group RC, Natuf (%) |        |
|-------------|-----------|------------------|--------|--------|------------------|------|------------------------|------|--------------------|--------|---------------------|--------|
|             |           |                  | A.-1   | A.-3   | A.-1             | A.-3 | A.-1                   | A.-3 | A.-1               | A.-3   | A.-1                | A.-3   |
| + Alluvial  | ++        | Alluvial         | 45.3 % | 57.3 % | 0.4              | 0.5  | 0.4                    | 0.5  | 1.6 %              | 1.7 %  | 45.3 %              | 57.3 % |
| ++ Aquifer  | +++       | low-LBK          | 45.3 % | 57.3 % | 4.6              | 5.9  |                        |      |                    |        |                     |        |
|             |           | Jerusalem        | 45.3 % | 57.3 % | 2.3              | 2.9  |                        |      |                    |        |                     |        |
|             |           | up-LBK           | 45.3 % | 54.1 % | 3.7              | 4.4  | 13.3                   | 16.3 | 55.1 %             | 58.1 % | 45.3 %              | 55.8 % |
|             |           | Hebron           | 45.3 % | 54.1 % | 2.6              | 3.1  |                        |      |                    |        |                     |        |
| + Aquifer   | ±         | up-UBK           | 54.1 % | 54.1 % | 0.8              | 0.8  |                        |      |                    |        |                     |        |
|             |           | low-UBK          | 44.7 % | 49.4 % | 2.4              | 2.6  |                        |      |                    |        |                     |        |
|             |           | up-Beteheh       | 44.7 % | 49.4 % | 1.9              | 2.1  | 7.4                    | 8.3  | 30.7 %             | 29.4 % | 44.6 %              | 49.8 % |
|             |           | low-Beteheh      | 41.8 % | 49.4 % | 2.3              | 2.8  |                        |      |                    |        |                     |        |
| + Aquitard  | ±         | Ein Qriya        | 41.8 % | 41.8 % | 0.5              | 0.5  | 3.0                    | 3.0  | 12.6 %             | 10.8 % | 41.8 %              | 41.8 % |
|             |           | low-Yatta        | 41.8 % | 41.8 % | 2.6              | 2.6  |                        |      |                    |        |                     |        |
| - Aquiclude | - - -     | Senonian, Aptian | 0 %    | 0 %    | 0.0              | 0.0  | 0                      | 0    | 0 %                | 0 %    | 0 %                 | 0 %    |
|             |           | up-Yatta         | 0 %    | 0 %    | 0.0              | 0.0  | 0                      | 0    | 0 %                | 0 %    | 0 %                 | 0 %    |
| <b>SUM</b>  |           |                  | -      | -      | 24.1             | 28.1 | 24.1                   | 28.1 | 100 %              | 100 %  | 39.4 %              | 46.1 % |

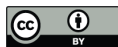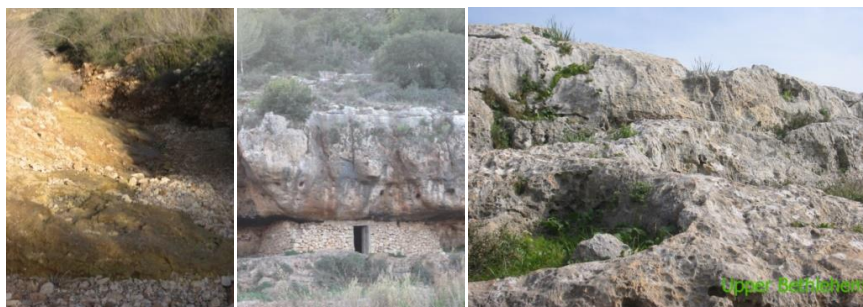

845 **Figure A1.** Outcrops – a) rare outcrops of yellow marls (upper-Yatta), b) reefal limestone cliff at Wadi Zarqa (upper-UBK),  
c) karstic karren and soil pocket landscape (upper-Betelehem)

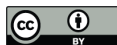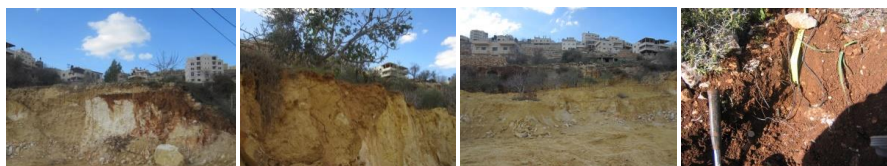

850 **Figure A2.** Soil cover – a, b & c) soil covering marly limestone with some white Nari crust  
(bottom Hebron/Top Yatta ftn.); d) Ras Karkar terrace soil measurement site (lower Hebron ftn.)
